# Supplementary material
Source: MDPI journal article supplement (https://www.mdpi.com/2076-3417/13/16/9142)
Supplement: s1 [file s1]

# Supplementary data

K-S test for the month of July illustrated in Figures and K-S test statistic D is illustrated in tables for CMIP5 models used in the analysis.

For precipitation: **(a)** simulated data without correction, **(b)** LS corrected, **(c)** LOCI corrected, **(d)** PT corrected and **(e)** DM corrected precipitation data

For maximum and minimum temperature: **(a)** simulated data without correction, **(b)** LS corrected, **(c)** VS corrected and **(d)** DM corrected temperature data.

**Series 1** represents observed data and **Series 2** represents model simulated and bias corrected data

## 1. CMCC-CESM

### Precipitation

**(a)**

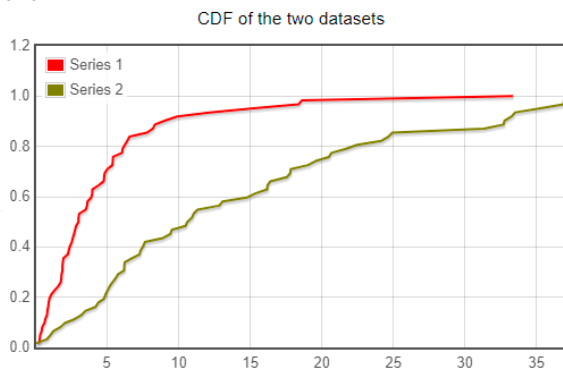

**(b)**

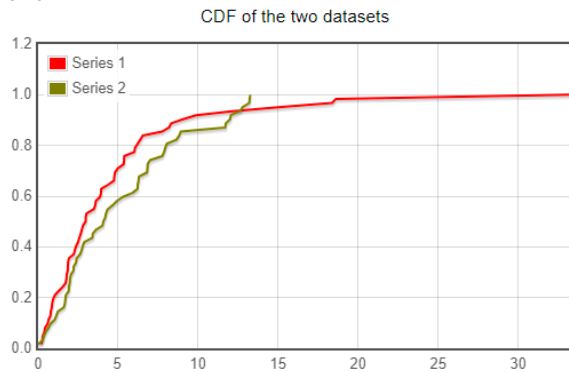

**(c)**

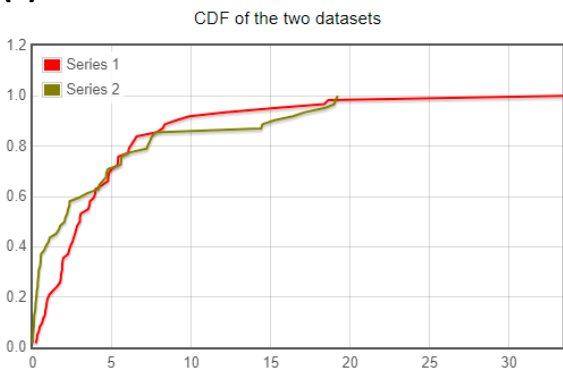

**(d)**

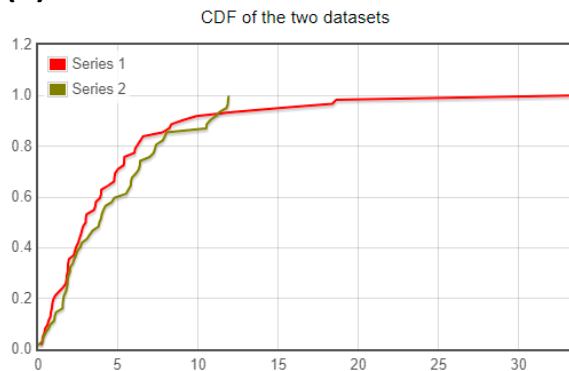

(e)

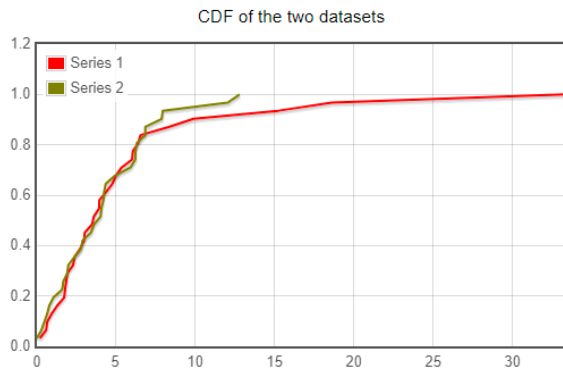

| No Correction | Linear Scaling | Local Intensity Scaling | Power Transformation | Distribution Mapping |
|---------------|----------------|-------------------------|----------------------|----------------------|
| <b>D</b>      | <b>D</b>       | <b>D</b>                | <b>D</b>             | <b>D</b>             |
| 0.50          | 0.18           | 0.29                    | 0.16                 | 0.09                 |

## Maximum Temperature

(a)

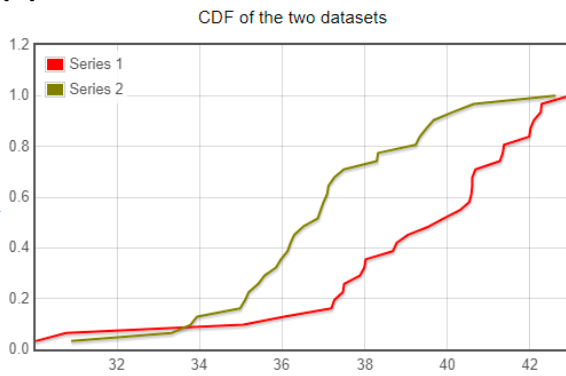

(b)

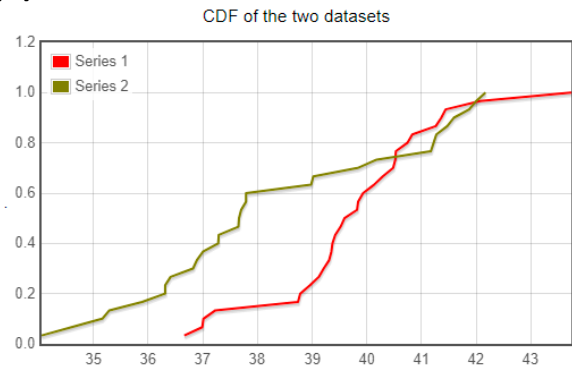

(c)

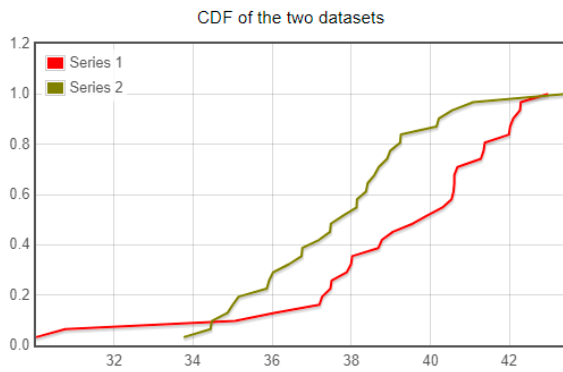

(d)

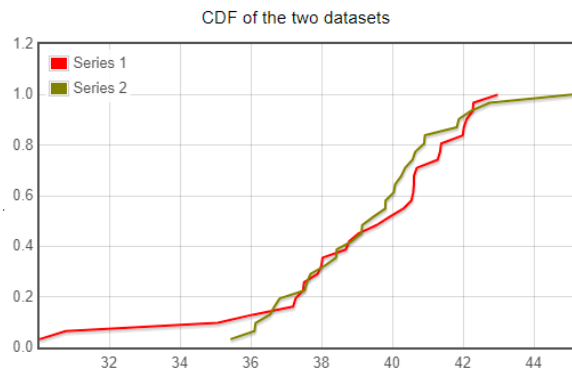

| No Correction | Linear Scaling | Variance scaling | Distribution Mapping |
|---------------|----------------|------------------|----------------------|
| <b>D</b>      | <b>D</b>       | <b>D</b>         | <b>D</b>             |
| 0.52          | 0.39           | 0.47             | 0.16                 |

## Minimum Temperature

(a)

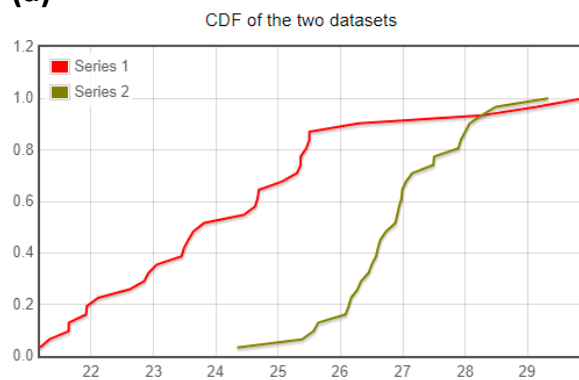

(b)

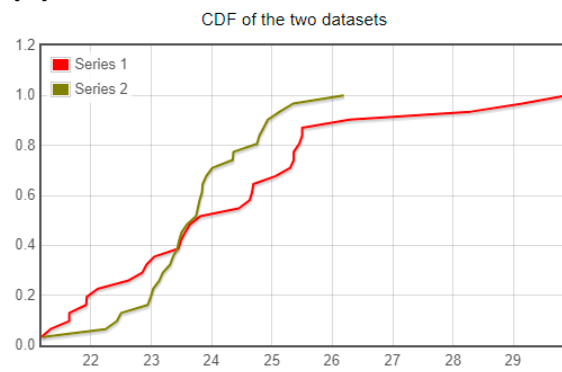

(c)

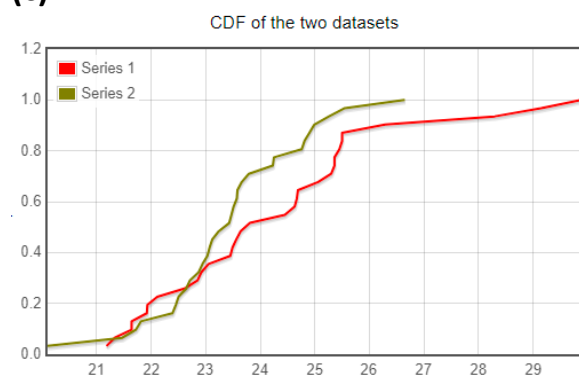

(d)

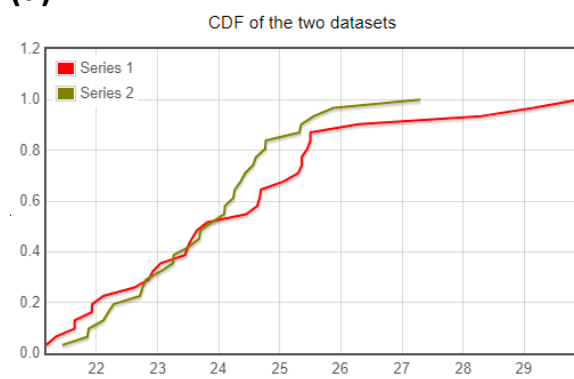

| No Correction | Linear Scaling | Variance scaling | Distribution Mapping |
|---------------|----------------|------------------|----------------------|
| <b>D</b>      | <b>D</b>       | <b>D</b>         | <b>D</b>             |
| 0.81          | 0.26           | 0.26             | 0.23                 |

# 2. CNRM-CM5

## Precipitation

(a)

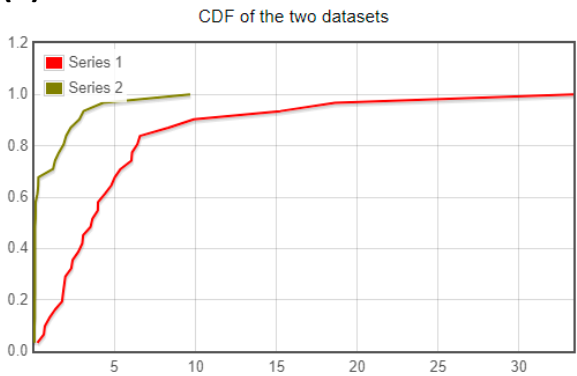

(b)

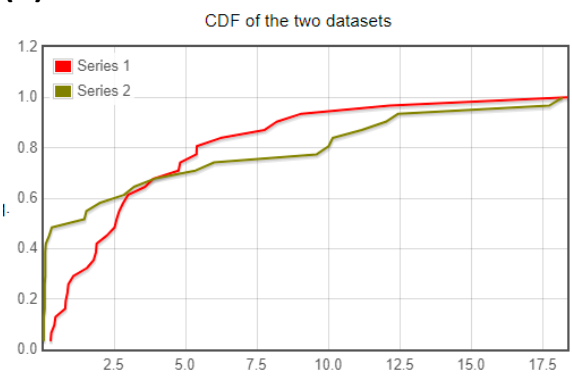

(c)

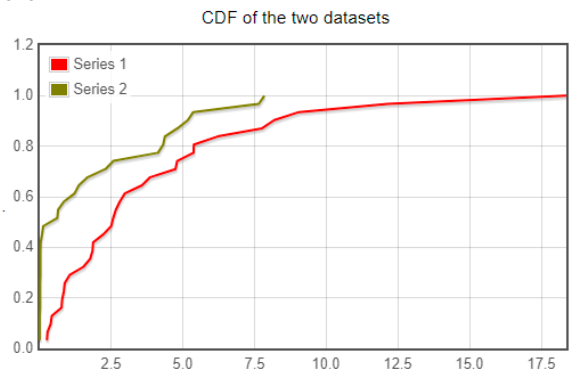

(d)

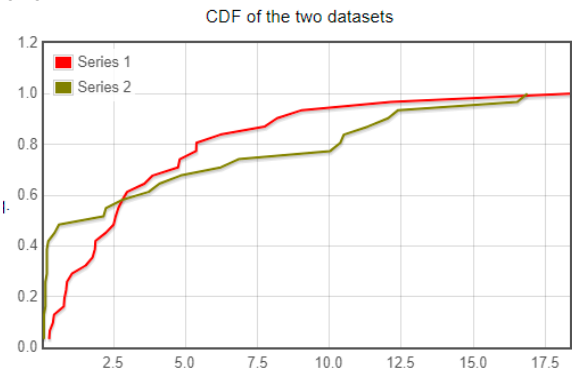

(e)

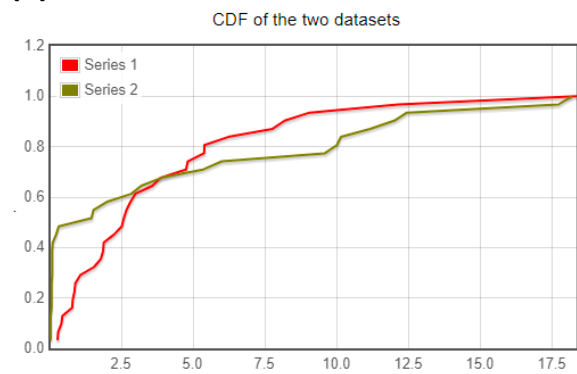

| No Correction | Linear Scaling | Local Intensity Scaling | Power Transformation | Distribution Mapping |
|---------------|----------------|-------------------------|----------------------|----------------------|
| <b>D</b>      | <b>D</b>       | <b>D</b>                | <b>D</b>             | <b>D</b>             |
| 0.65          | 0.45           | 0.48                    | 0.42                 | 0.29                 |

## Maximum Temperature

(a)

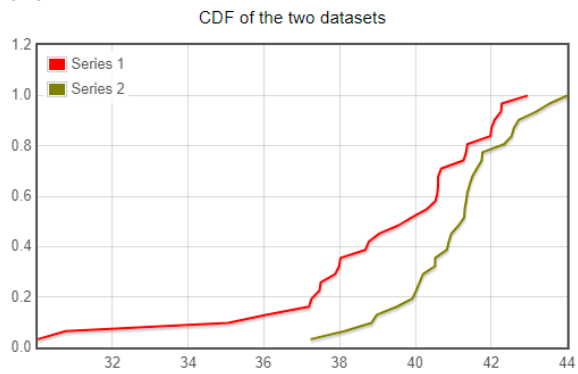

(b)

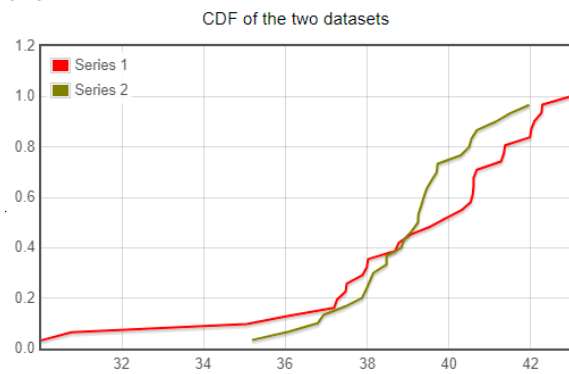

(c)

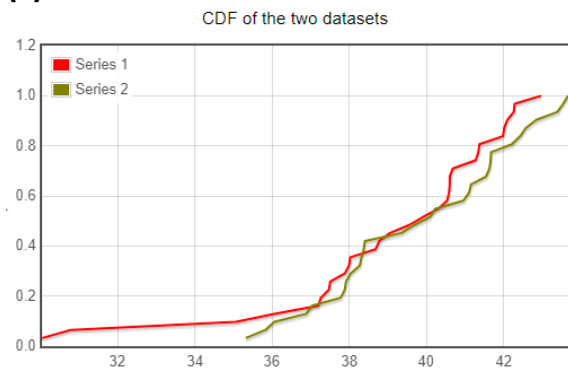

(d)

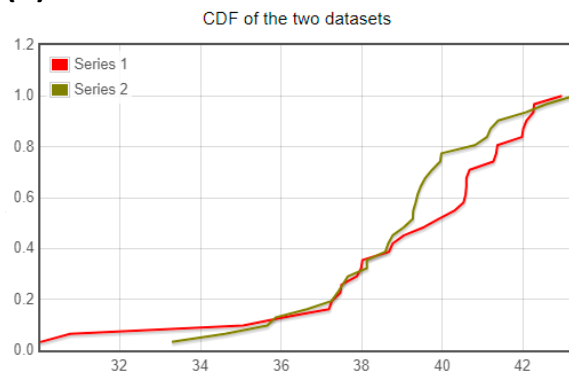

| No Correction | Linear Scaling | Variance scaling | Distribution Mapping |
|---------------|----------------|------------------|----------------------|
| D             | D              | D                | D                    |
| 0.35          | 0.25           | 0.16             | 0.22                 |

## Minimum Temperature

(a)

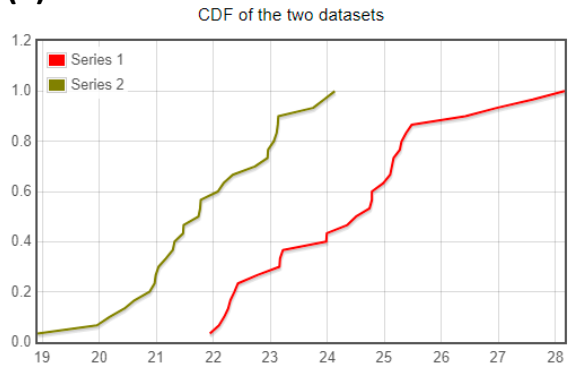

(b)

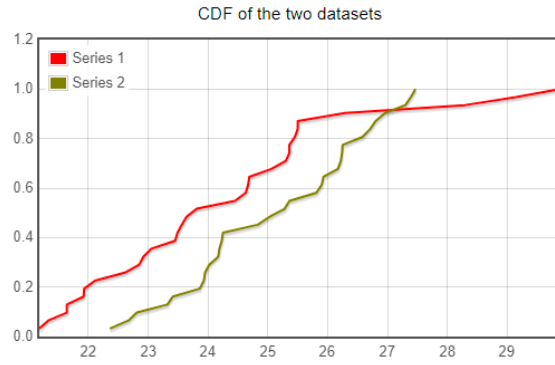

(c)

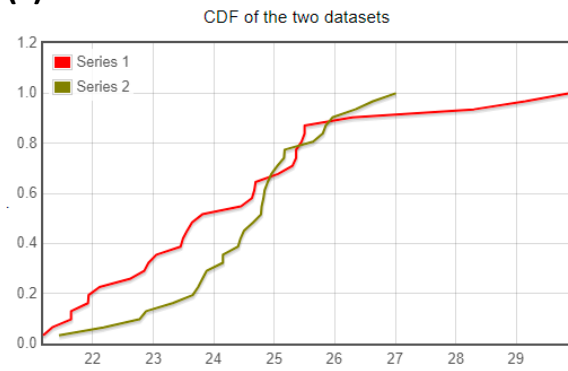

(d)

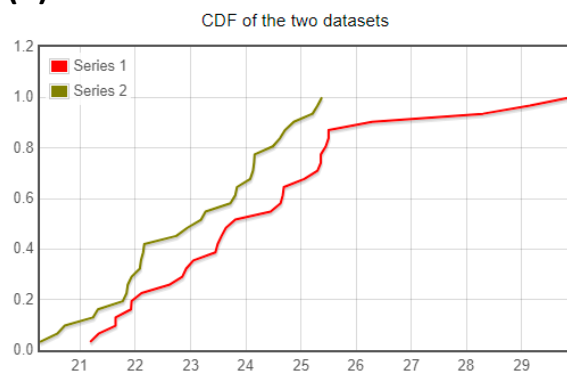

| No Correction | Linear Scaling | Variance scaling | Distribution Mapping |
|---------------|----------------|------------------|----------------------|
| D             | D              | D                | D                    |
| 0.63          | 0.35           | 0.32             | 0.29                 |

### 3. GFDL-CM3

#### Precipitation

(a)

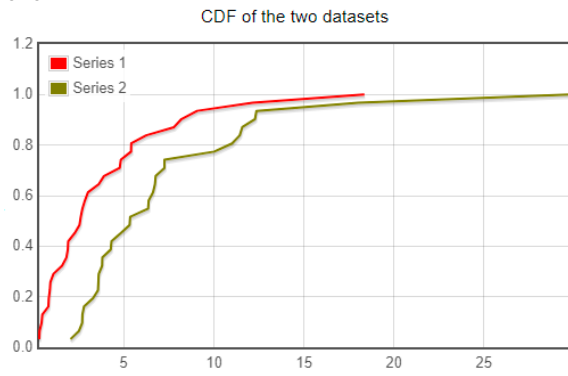

(b)

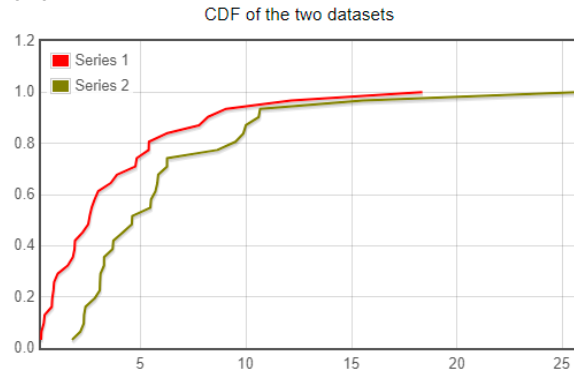

(c)

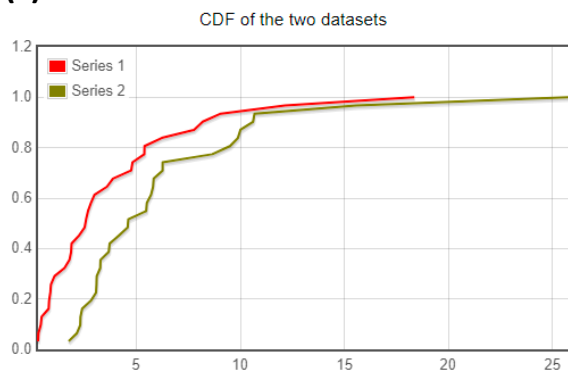

(d)

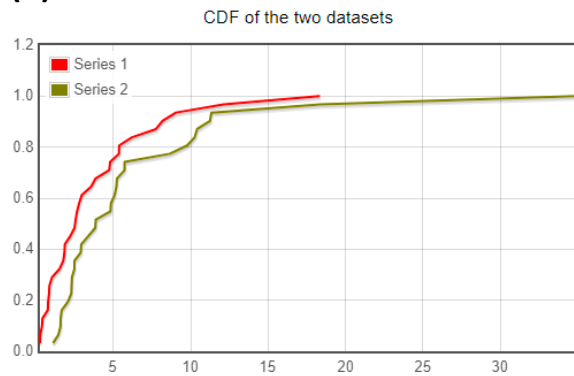

(e)

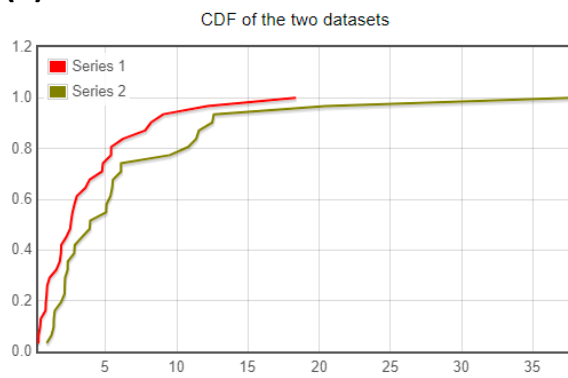

| No Correction | Linear Scaling | Local Intensity Scaling | Power Transformation | Distribution Mapping |
|---------------|----------------|-------------------------|----------------------|----------------------|
| <b>D</b>      | <b>D</b>       | <b>D</b>                | <b>D</b>             | <b>D</b>             |
| 0.45          | 0.40           | 0.44                    | 0.29                 | 0.25                 |

## Maximum Temperature

(a)

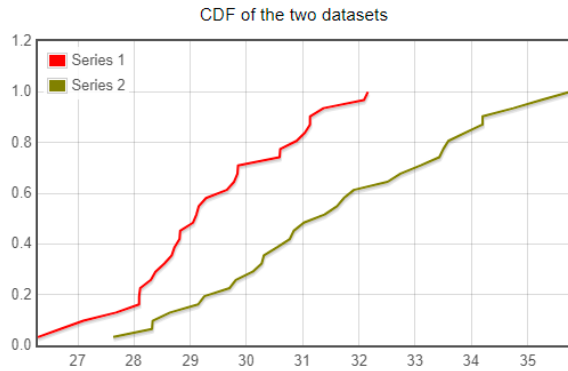

(b)

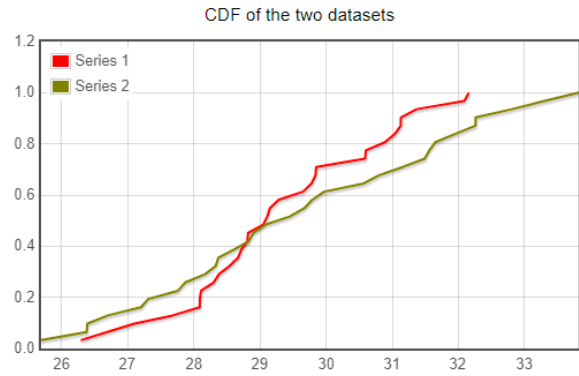

(c)

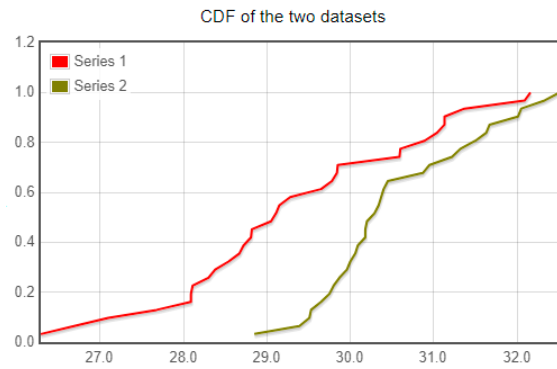

(d)

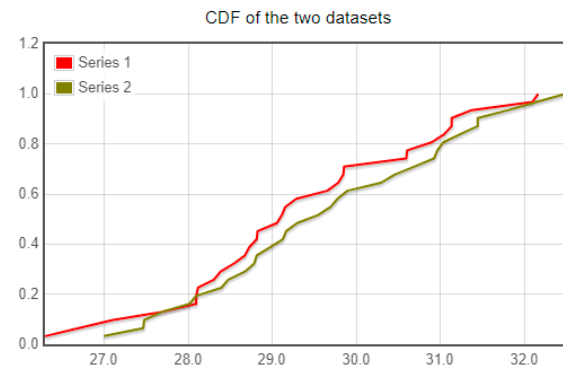

| No Correction | Linear Scaling | Variance scaling | Distribution Mapping |
|---------------|----------------|------------------|----------------------|
| D             | D              | D                | D                    |
| 0.45          | 0.22           | 0.54             | 0.12                 |



## Minimum Temperature

(a)

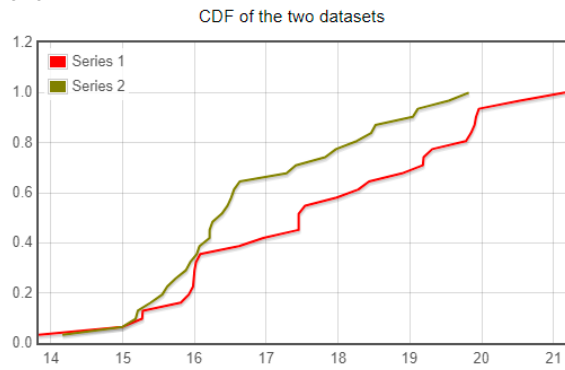

(b)

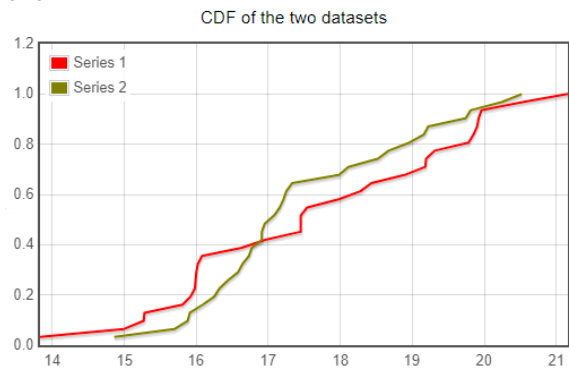

(c)

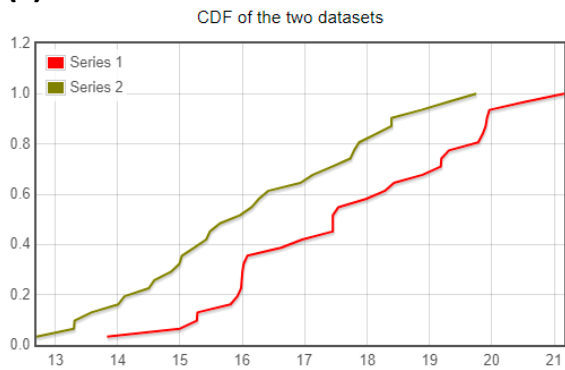

(d)

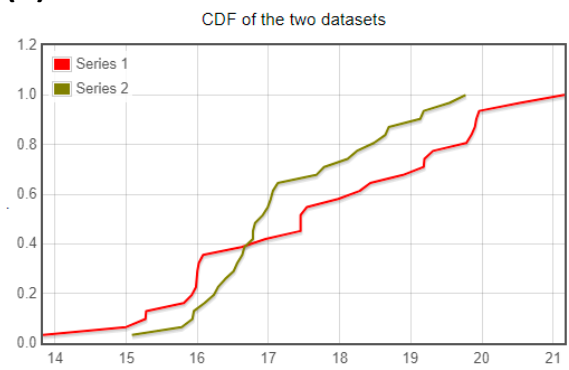

| No Correction | Linear Scaling | Variance scaling | Distribution Mapping |
|---------------|----------------|------------------|----------------------|
| D             | D              | D                | D                    |
| 0.29          | 0.20           | 0.35             | 0.23                 |

## 4. HadCM3

### Precipitation

(a)

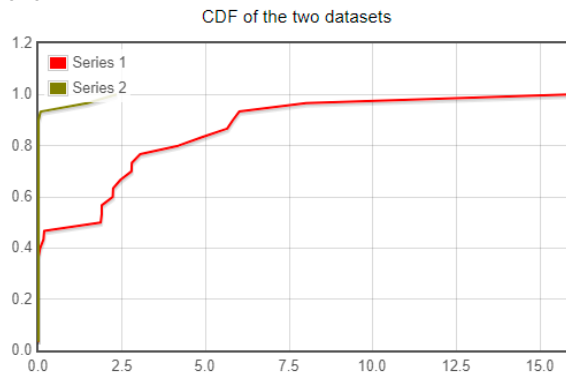

(b)

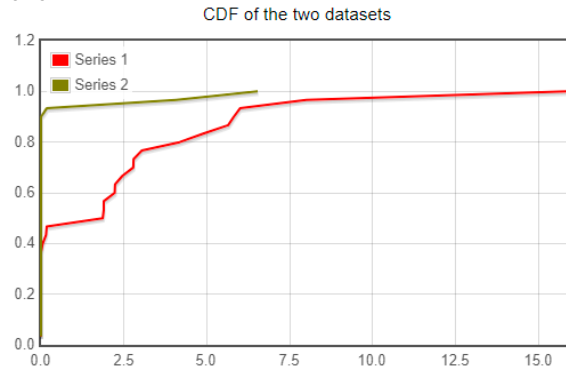

(c)

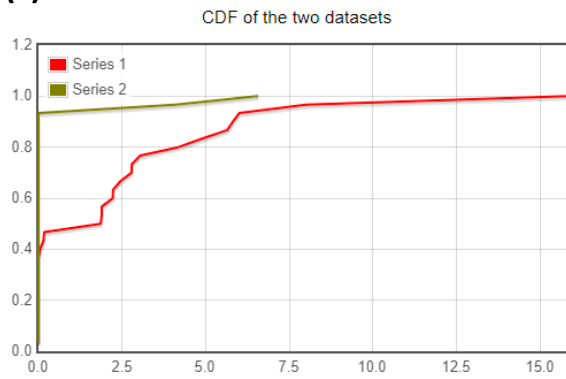

(d)

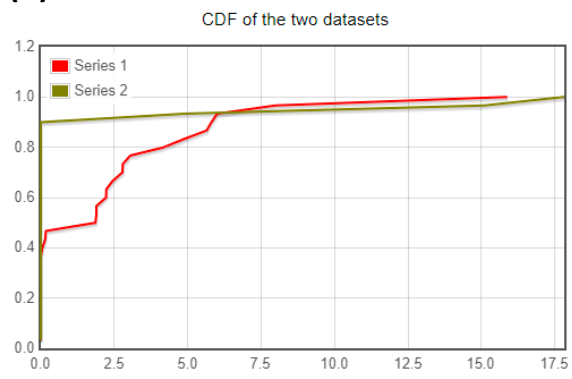

(e)

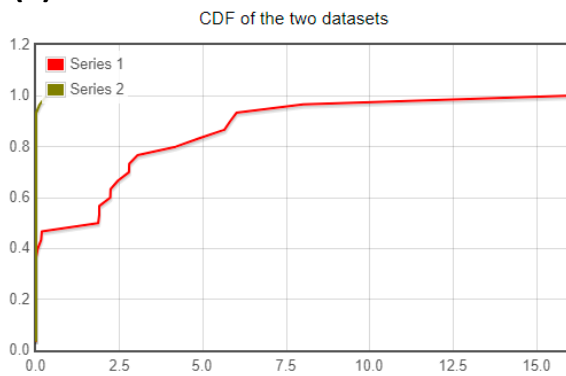

| No Correction | Linear Scaling | Local Intensity Scaling | Power Transformation | Distribution Mapping |
|---------------|----------------|-------------------------|----------------------|----------------------|
| <b>D</b>      | <b>D</b>       | <b>D</b>                | <b>D</b>             | <b>D</b>             |
| 0.56          | 0.52           | 0.54                    | 0.50                 | 0.54                 |

## Maximum Temperature

(a)

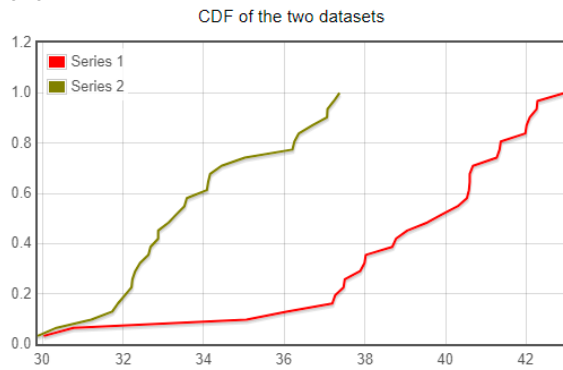

(b)

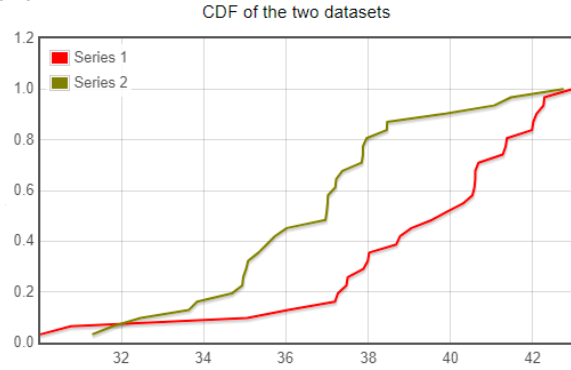

(c)

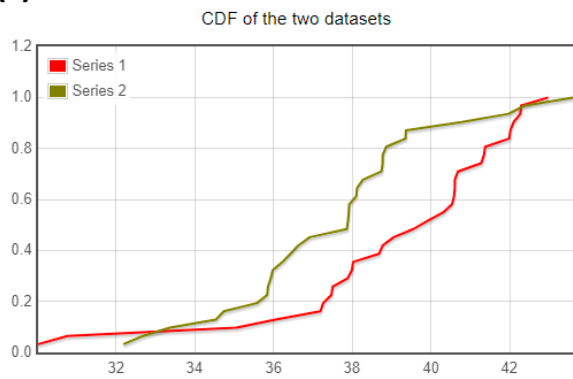

(d)

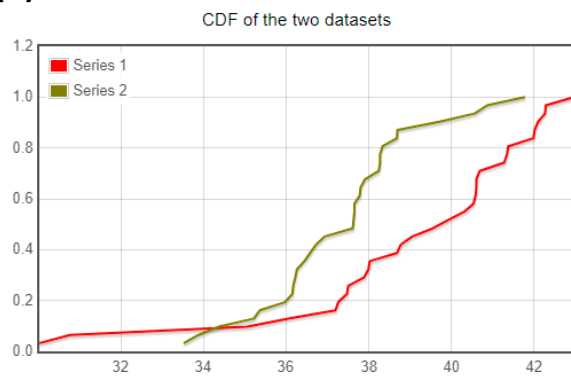

| No Correction | Linear Scaling | Variance scaling | Distribution Mapping |
|---------------|----------------|------------------|----------------------|
| D             | D              | D                | D                    |
| 0.81          | 0.51           | 0.41             | 0.48                 |

## Minimum Temperature

(a)

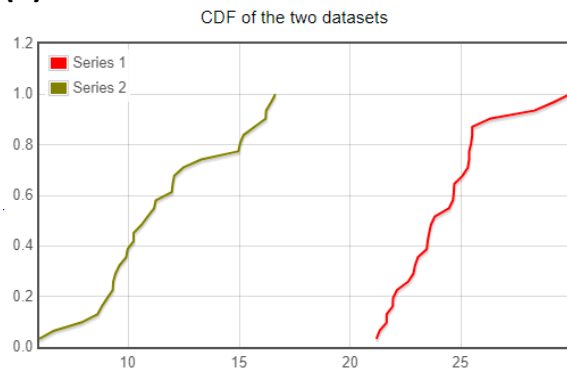

(b)

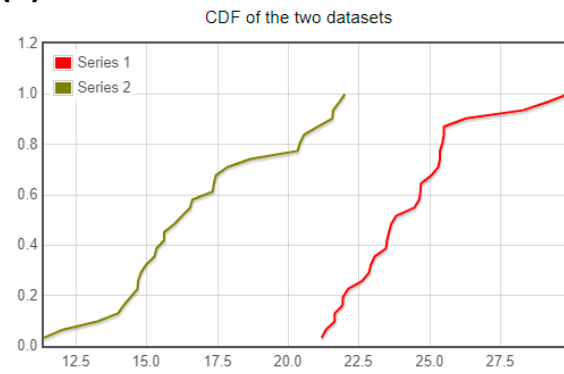

(c)

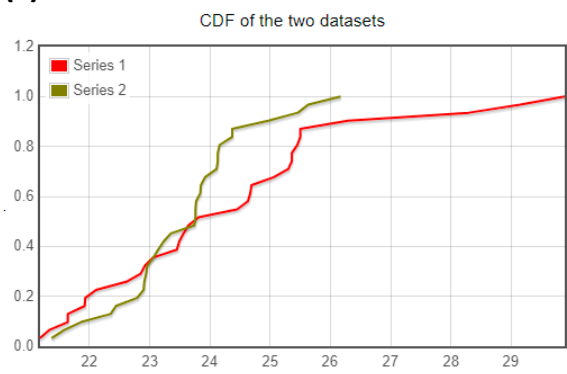

(d)

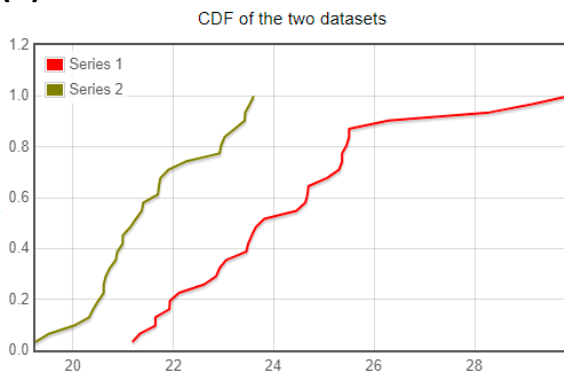

| No<br>Correction | Linear<br>Scaling | Variance<br>scaling | Distribution<br>Mapping |
|------------------|-------------------|---------------------|-------------------------|
| D                | D                 | D                   | D                       |
| 1.00             | 0.87              | 0.35                | 0.58                    |

## 5. HADGEM2-ES

### Precipitation

(a)

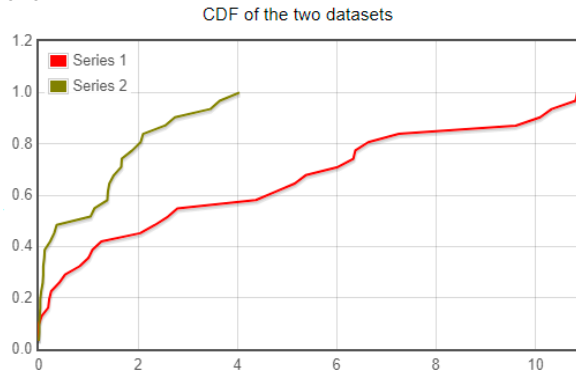

(b)

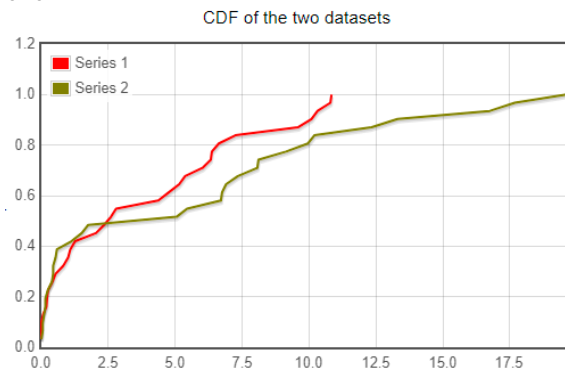

(c)

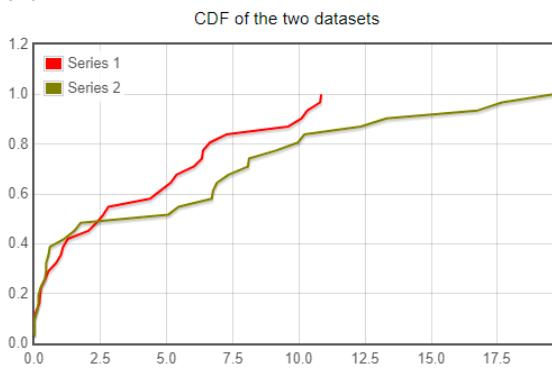

(d)

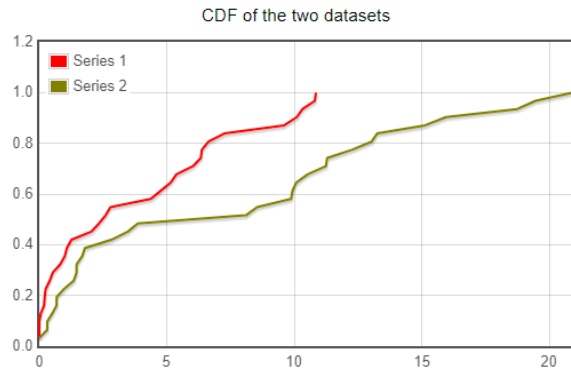

(e)

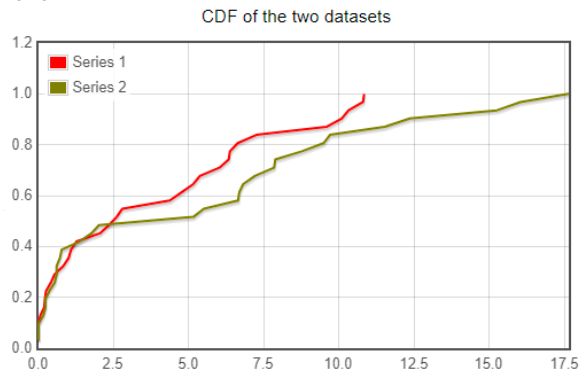

| No Correction | Linear Scaling | Local Intensity Scaling | Power Transformation | Distribution Mapping |
|---------------|----------------|-------------------------|----------------------|----------------------|
| <b>D</b>      | <b>D</b>       | <b>D</b>                | <b>D</b>             | <b>D</b>             |
| 0.45          | 0.25           | 0.25                    | 0.35                 | 0.24                 |

## Maximum Temperature

(a)

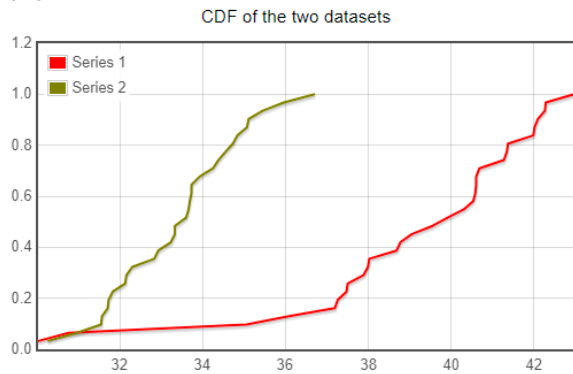

(b)

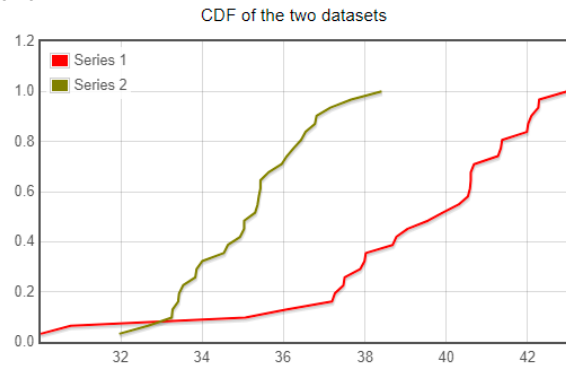

(c)

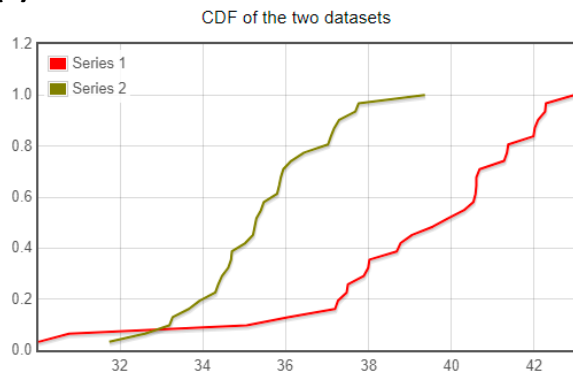

(d)

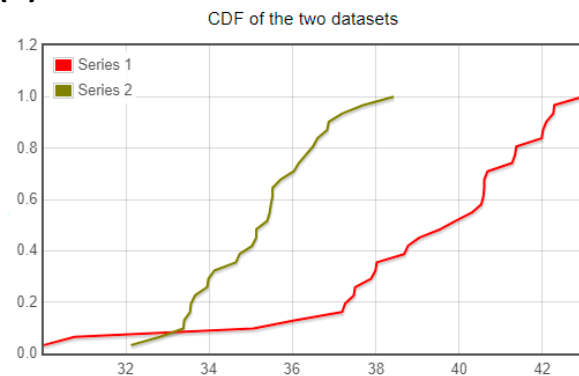

| No Correction | Linear Scaling | Variance scaling | Distribution Mapping |
|---------------|----------------|------------------|----------------------|
| <b>D</b>      | <b>D</b>       | <b>D</b>         | <b>D</b>             |
| 0.87          | 0.81           | 0.74             | 0.77                 |

## Minimum Temperature

(a)

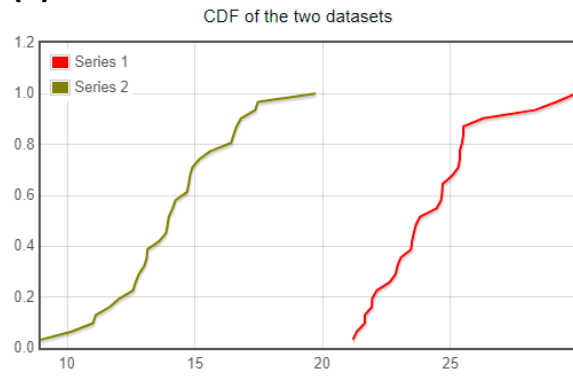

(b)

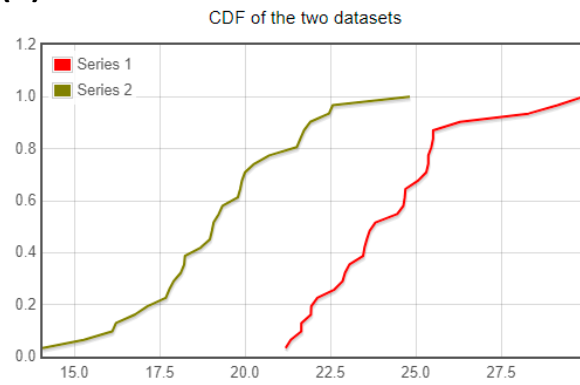

(c)

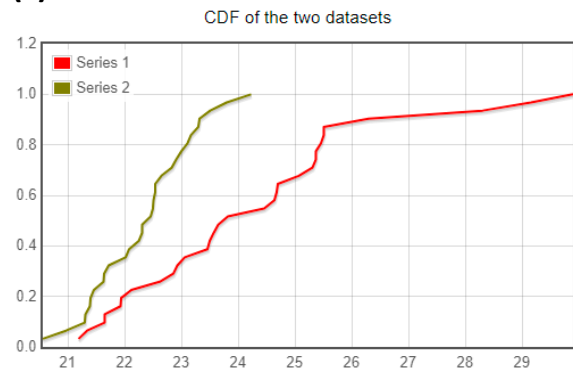

(d)

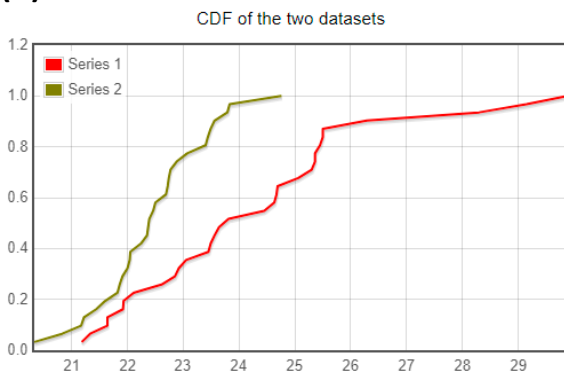

| No Correction | Linear Scaling | Variance scaling | Distribution Mapping |
|---------------|----------------|------------------|----------------------|
| D             | D              | D                | D                    |
| 1.00          | 0.77           | 0.54             | 0.48                 |

# 6. INM-CM4

## Precipitation

(a)

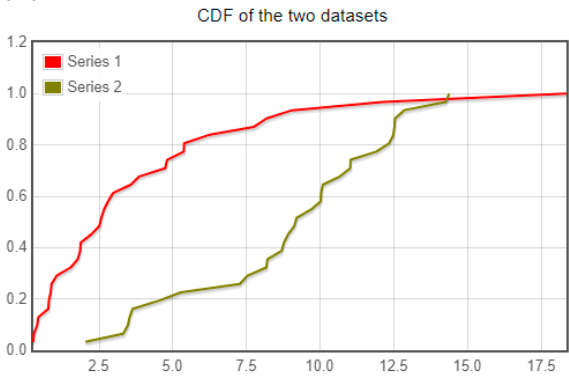

(b)

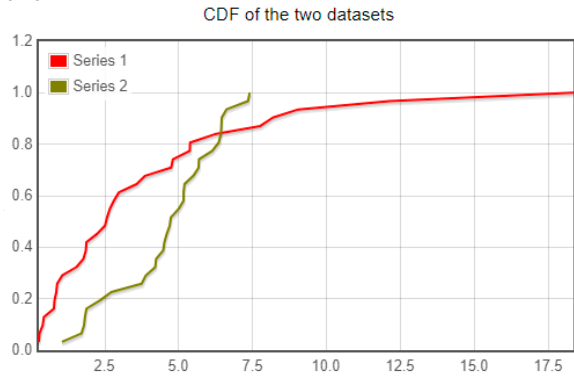

(c)

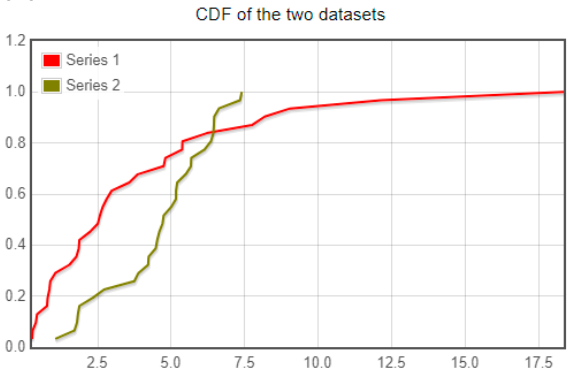

(d)

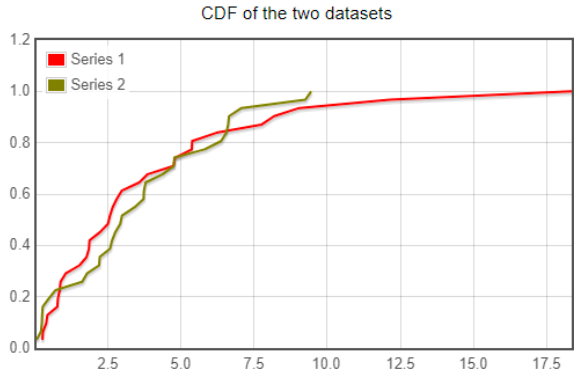

(e)

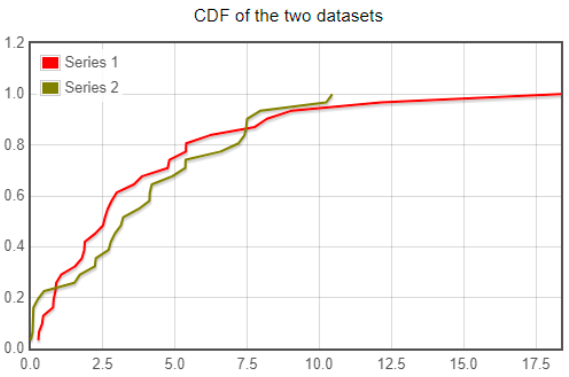

| No Correction | Linear Scaling | Local Intensity Scaling | Power Transformation | Distribution Mapping |
|---------------|----------------|-------------------------|----------------------|----------------------|
| D             | D              | D                       | D                    | D                    |
| 0.61          | 0.41           | 0.41                    | 0.12                 | 0.19                 |



## Maximum Temperature

(a)

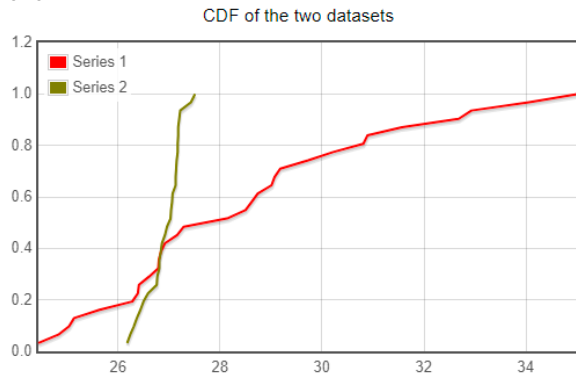

(b)

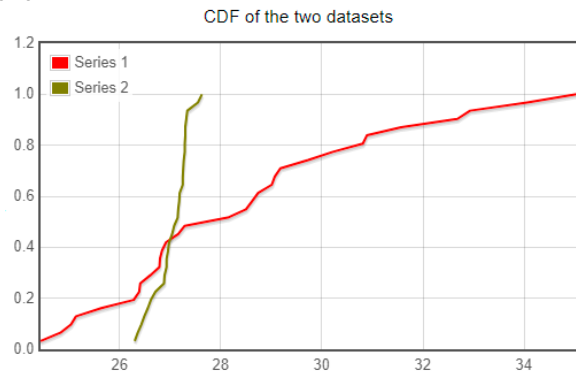

(c)

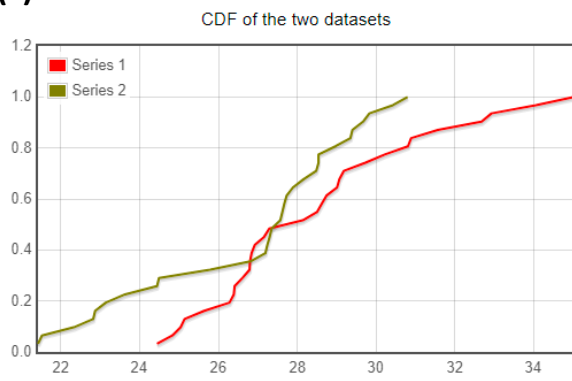

(d)

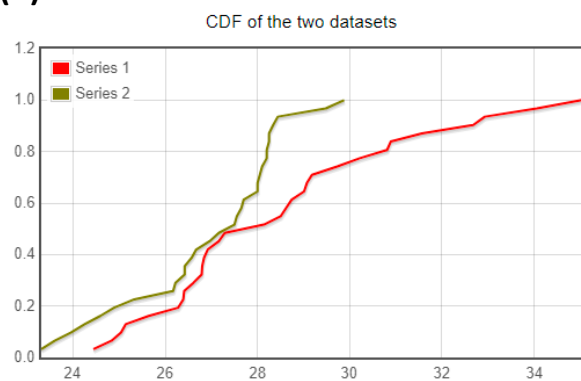

| No Correction | Linear Scaling | Variance scaling | Distribution Mapping |
|---------------|----------------|------------------|----------------------|
| <b>D</b>      | <b>D</b>       | <b>D</b>         | <b>D</b>             |
| 0.51          | 0.51           | 0.25             | 0.41                 |

## Minimum Temperature

(a)

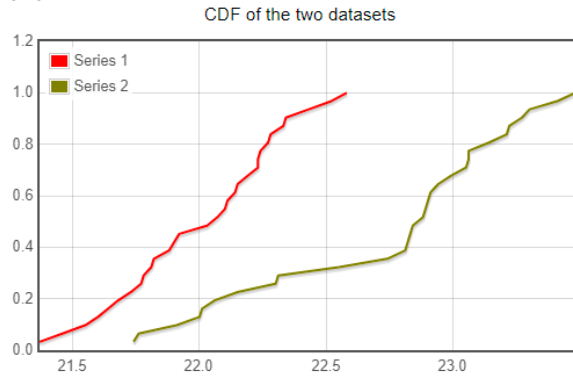

(b)

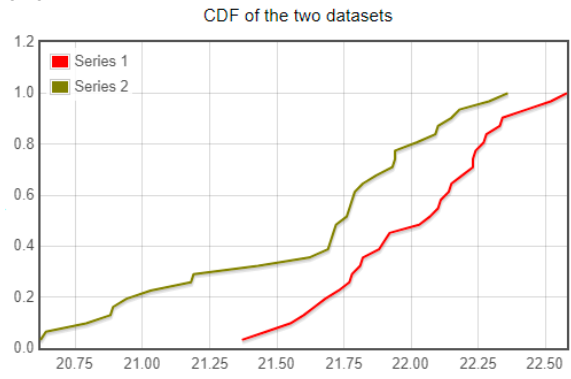

(c)

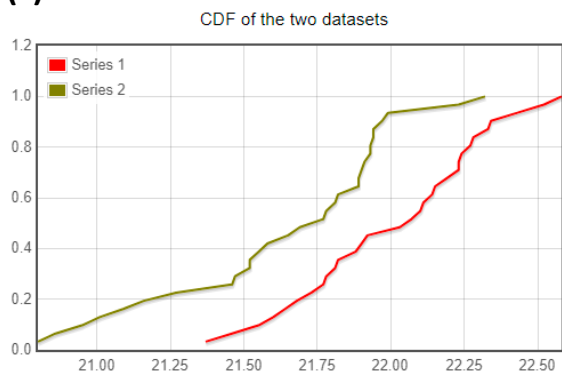

(d)

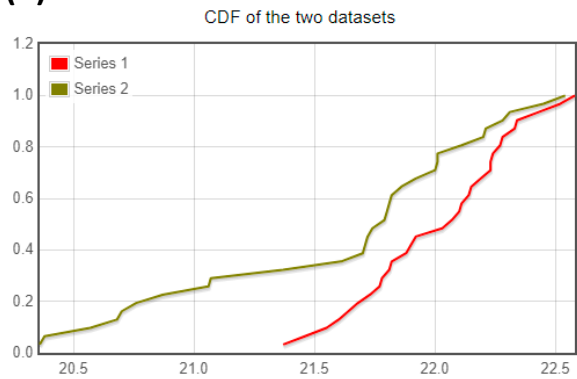

| No Correction | Linear Scaling | Variance scaling | Distribution Mapping |
|---------------|----------------|------------------|----------------------|
| <b>D</b>      | <b>D</b>       | <b>D</b>         | <b>D</b>             |
| 0.67          | 0.35           | 0.48             | 0.32                 |

# 7. MIROC-5

## Precipitation

(a)

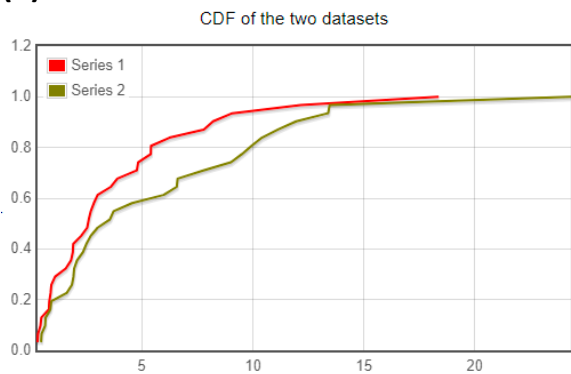

(b)

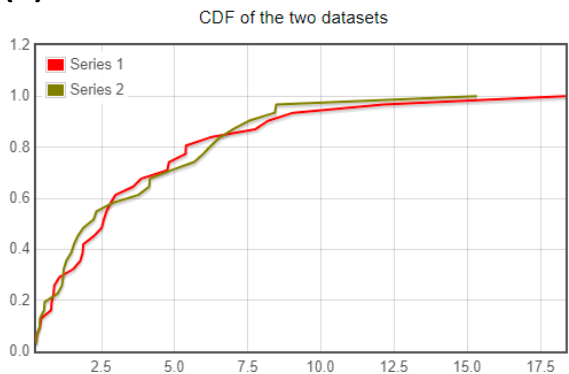

(c)

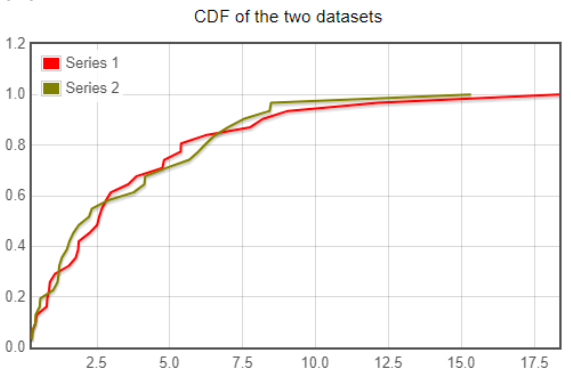

(d)

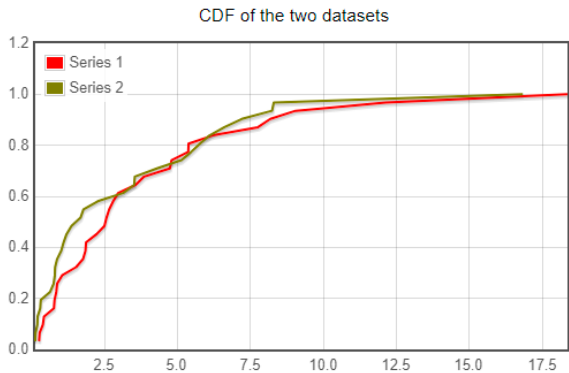

(e)

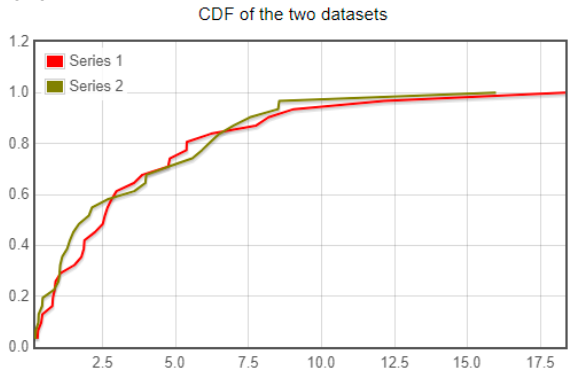

| No Correction | Linear Scaling | Local Intensity Scaling | Power Transformation | Distribution Mapping |
|---------------|----------------|-------------------------|----------------------|----------------------|
| D             | D              | D                       | D                    | D                    |
| 0.22          | 0.12           | 0.12                    | 0.19                 | 0.16                 |

## Maximum Temperature

(a)

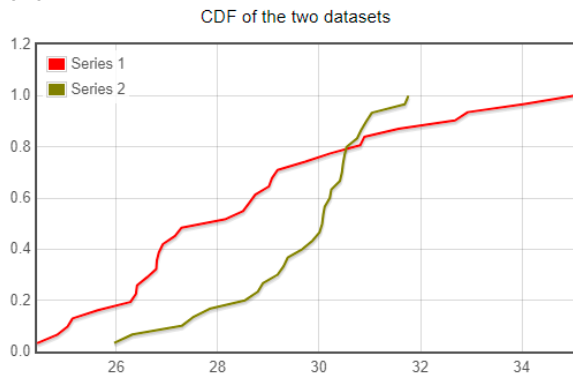

(b)

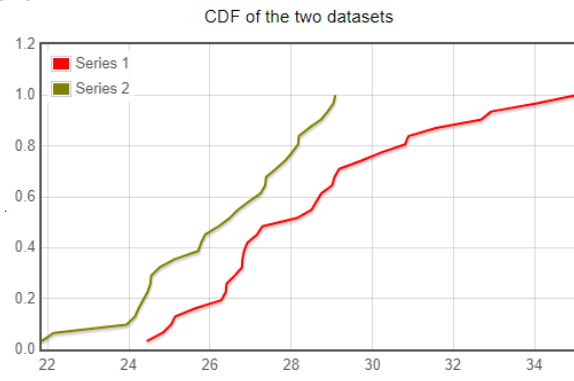

(c)

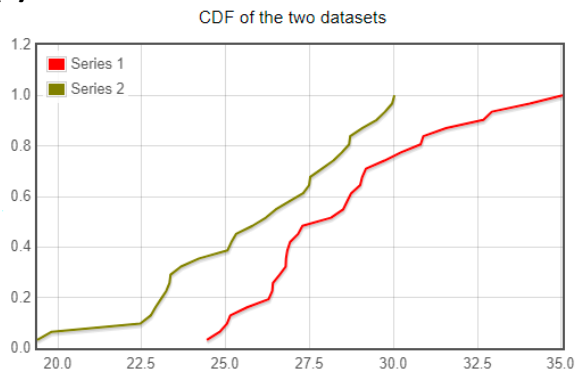

(d)

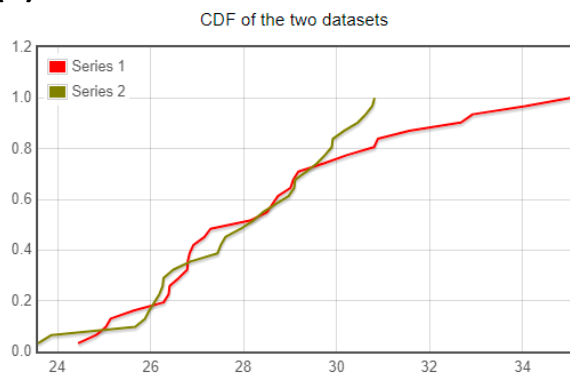

| No Correction | Linear Scaling | Variance scaling | Distribution Mapping |
|---------------|----------------|------------------|----------------------|
| <b>D</b>      | <b>D</b>       | <b>D</b>         | <b>D</b>             |
| 0.41          | 0.35           | 0.35             | 0.19                 |

## Minimum Temperature

(a)

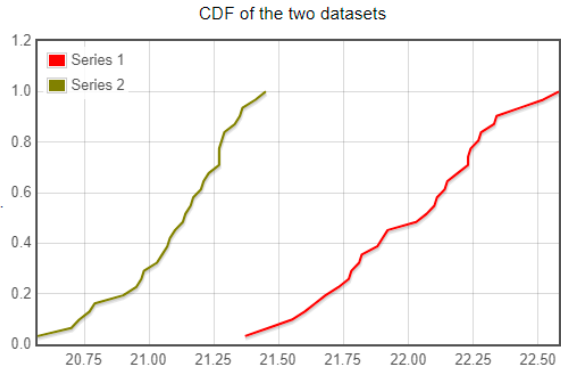

(b)

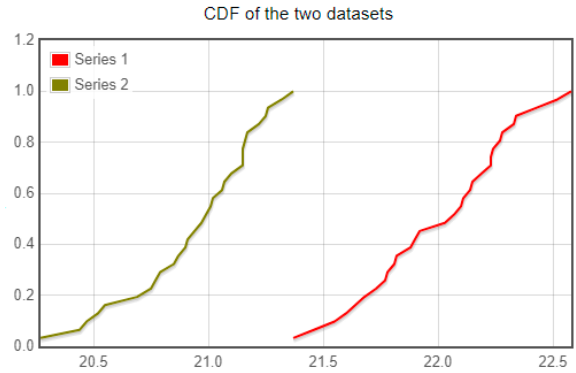

(c)

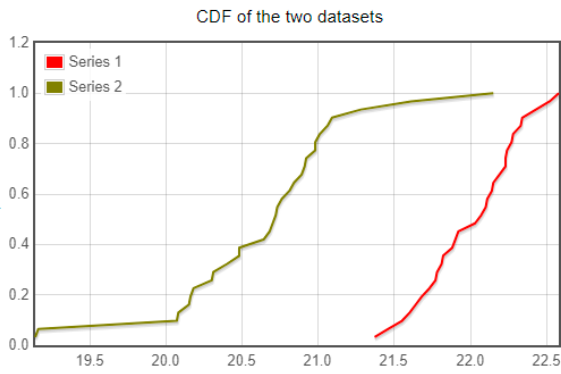

(d)

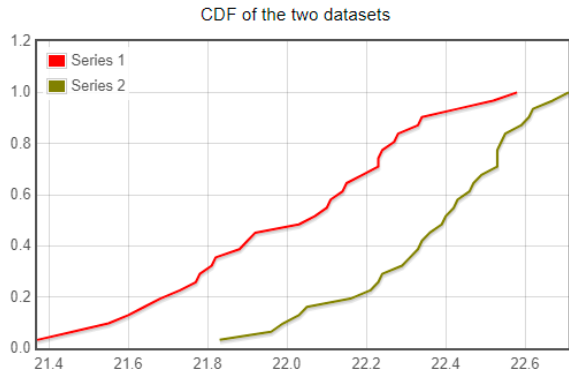

| No Correction | Linear Scaling | Variance scaling | Distribution Mapping |
|---------------|----------------|------------------|----------------------|
| D             | D              | D                | D                    |
| 0.96          | 0.96           | 0.93             | 0.54                 |

# 8. MPI-ESM-P

## Precipitation

(a)

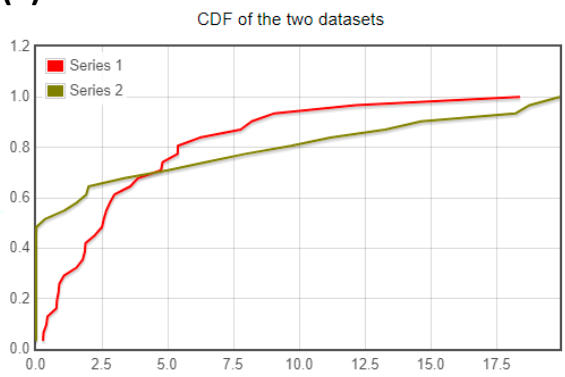

(b)

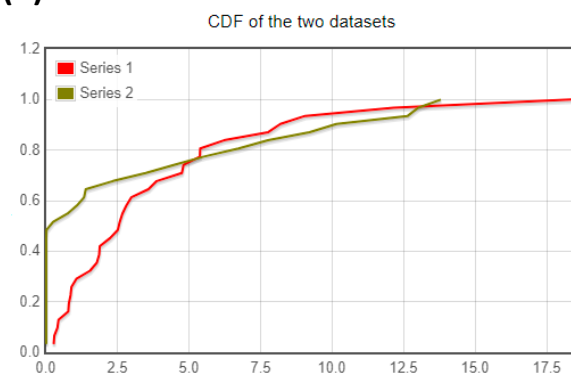

(c)

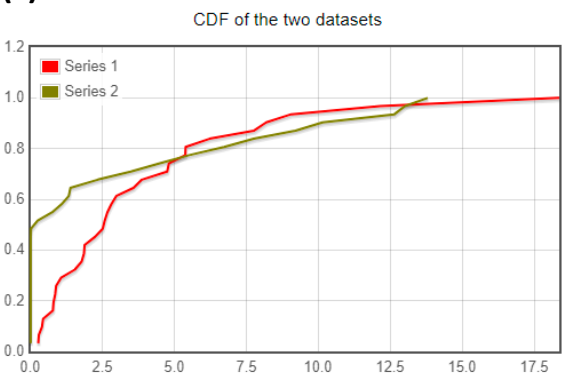

(d)

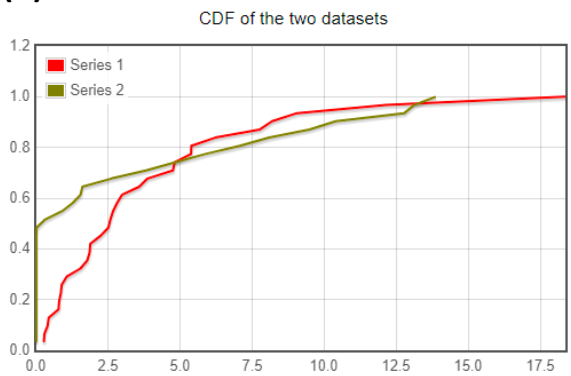

(e)

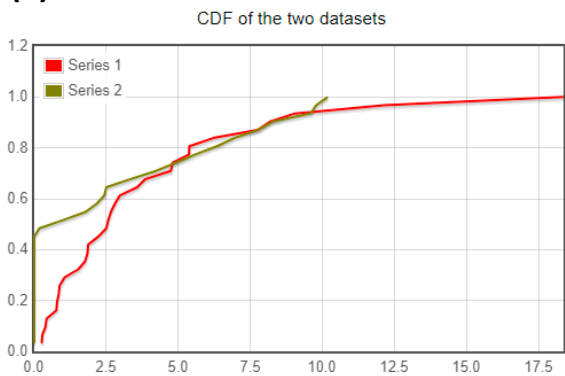

| No Correction | Linear Scaling | Local Intensity Scaling | Power Transformation | Distribution Mapping |
|---------------|----------------|-------------------------|----------------------|----------------------|
| D             | D              | D                       | D                    | D                    |
| 0.48          | 0.51           | 0.51                    | 0.48                 | 0.48                 |

## Maximum Temperature

(a)

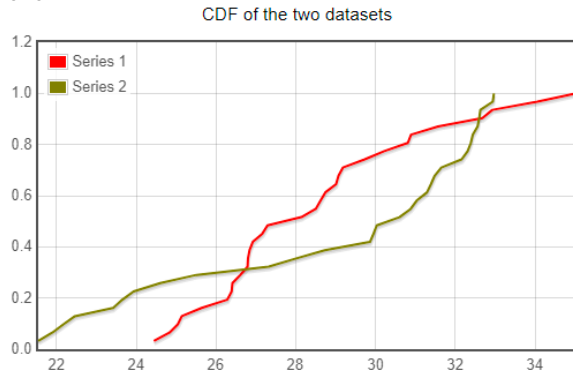

(b)

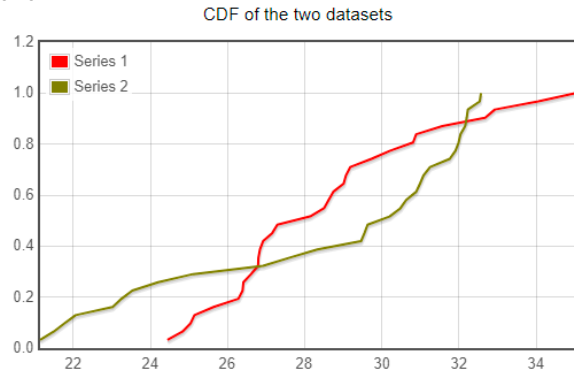

(c)

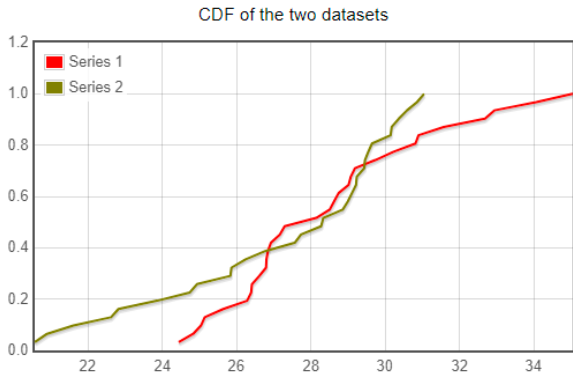

(d)

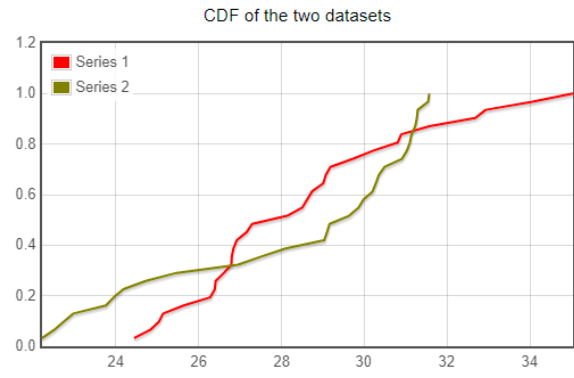

| No Correction | Linear Scaling | Variance scaling | Distribution Mapping |
|---------------|----------------|------------------|----------------------|
| <b>D</b>      | <b>D</b>       | <b>D</b>         | <b>D</b>             |
| 0.35          | 0.32           | 0.19             | 0.25                 |

## Minimum Temperature

(a)

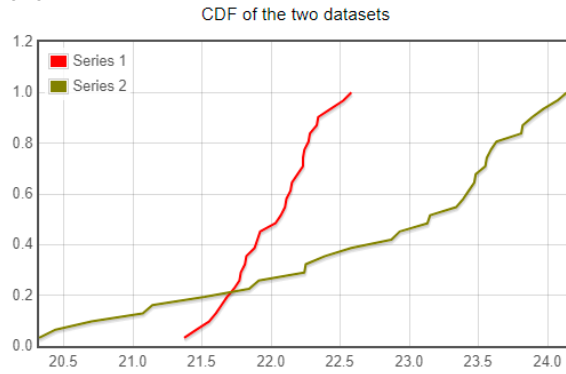

(b)

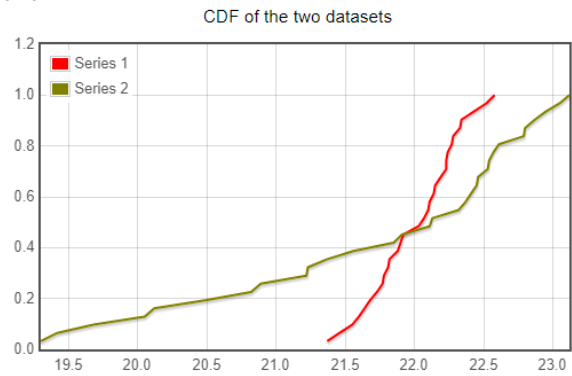

(c)

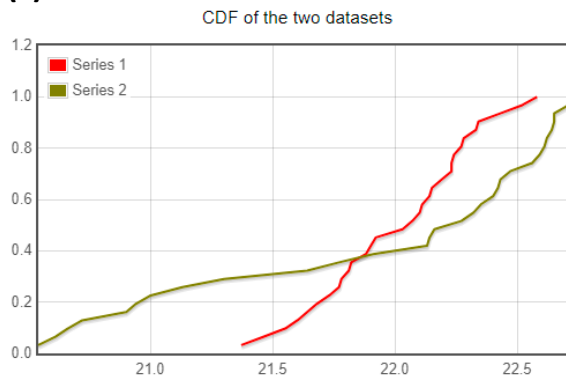

(d)

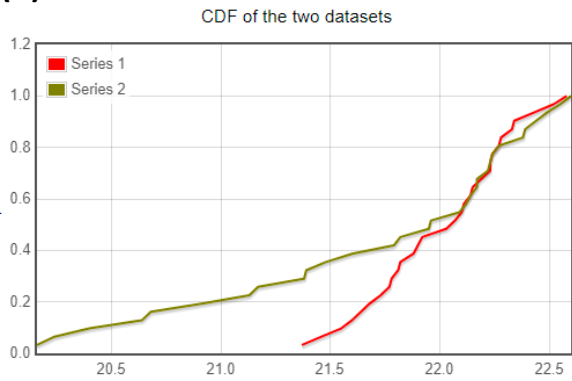

| No Correction | Linear Scaling | Variance scaling | Distribution Mapping |
|---------------|----------------|------------------|----------------------|
| D             | D              | D                | D                    |
| 0.61          | 0.35           | 0.35             | 0.29                 |



# 9. MRI-CGCM3

## Precipitation

(a)

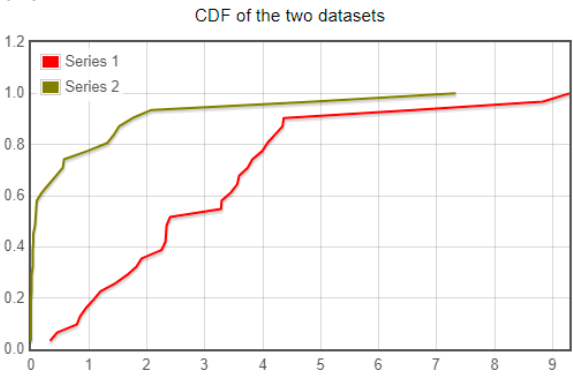

(b)

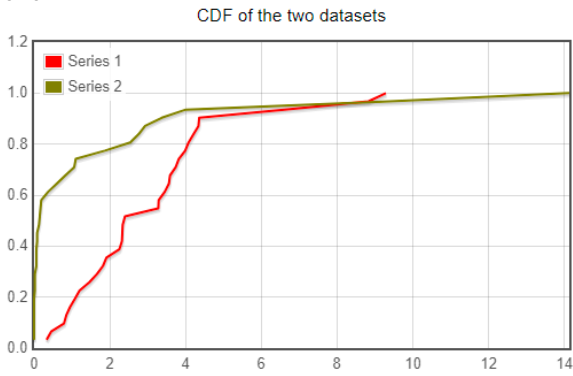

(c)

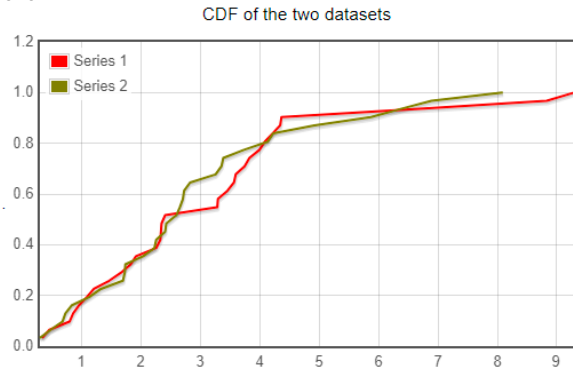

(d)

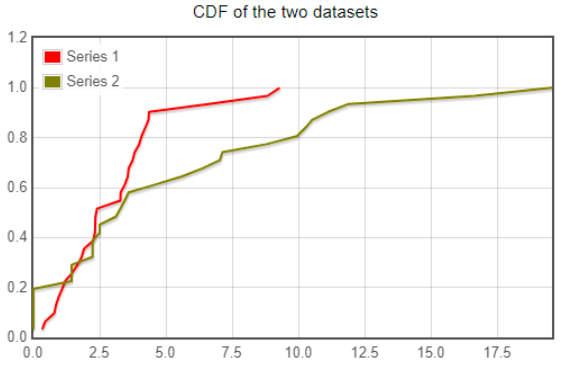

(e)

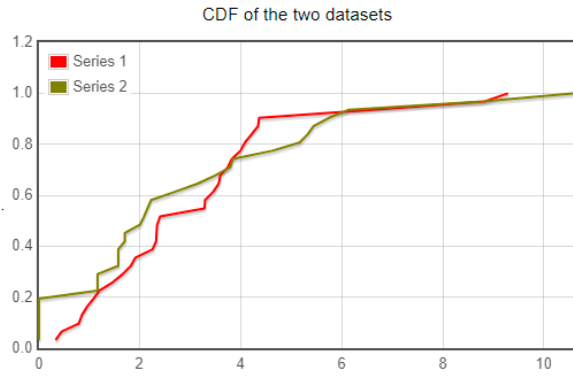

| No Correction | Linear Scaling | Local Intensity Scaling | Power Transformation | Distribution Mapping |
|---------------|----------------|-------------------------|----------------------|----------------------|
| D             | D              | D                       | D                    | D                    |
| 0.67          | 0.58           | 0.16                    | 0.32                 | 0.22                 |

## Maximum Temperature

(a)

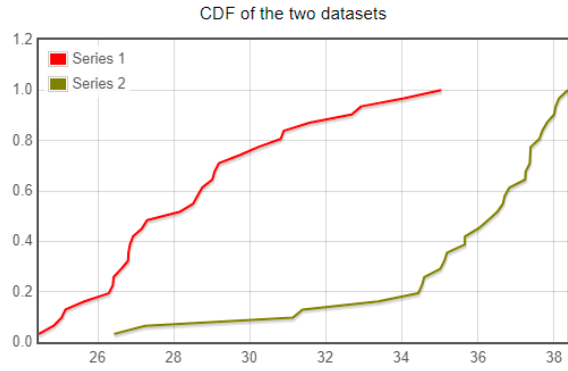

(b)

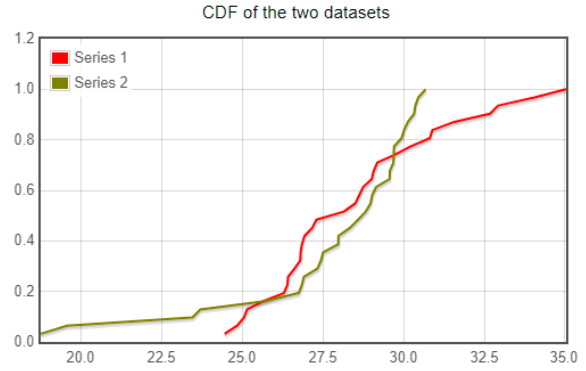

(c)

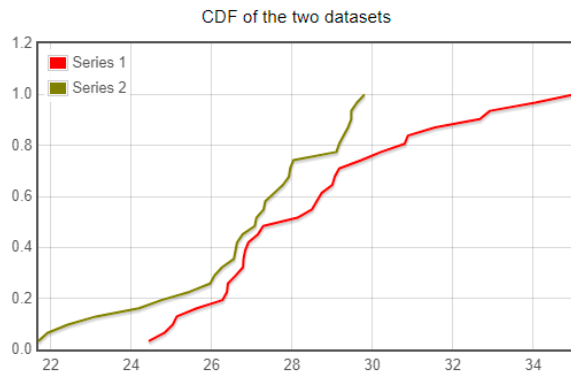

(d)

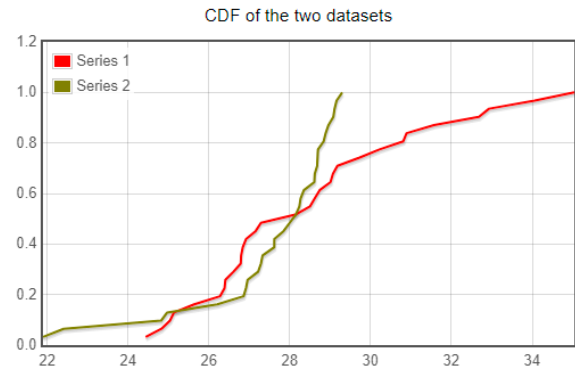

| No Correction | Linear Scaling | Variance scaling | Distribution Mapping |
|---------------|----------------|------------------|----------------------|
| D             | D              | D                | D                    |
| 0.80          | 0.22           | 0.25             | 0.29                 |

## Minimum Temperature

(a)

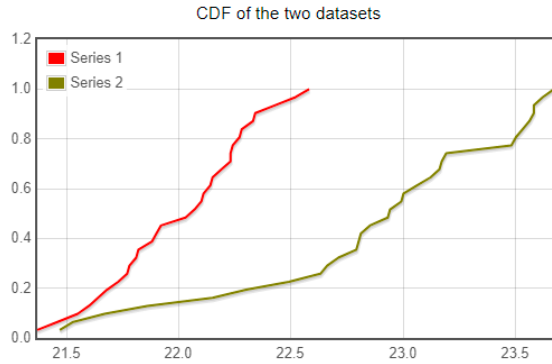

(b)

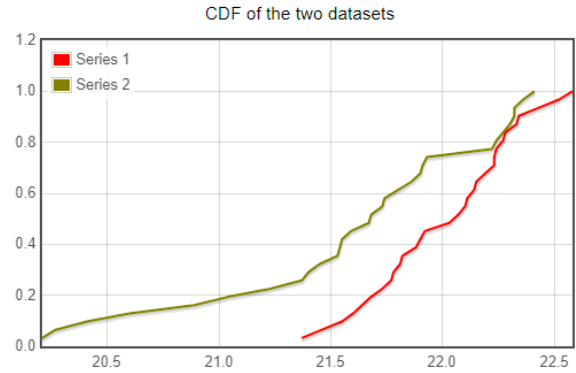

(c)

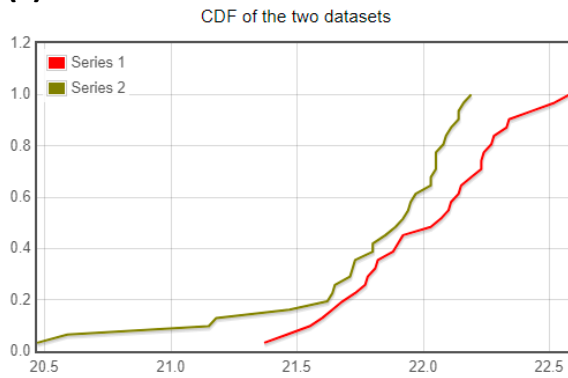

(d)

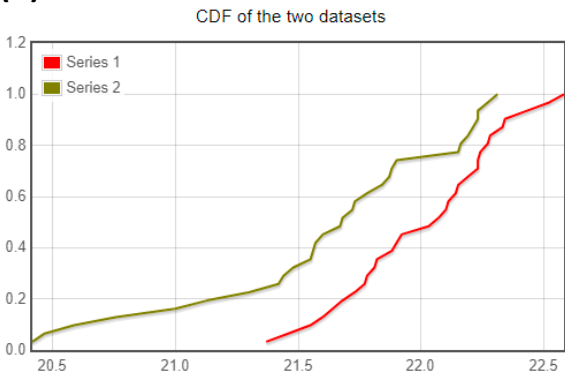

| No Correction | Linear Scaling | Variance scaling | Distribution Mapping |
|---------------|----------------|------------------|----------------------|
| <b>D</b>      | <b>D</b>       | <b>D</b>         | <b>D</b>             |
| 0.77          | 0.35           | 0.32             | 0.35                 |

# 10. MRI-ESM1

## Precipitation

(a)

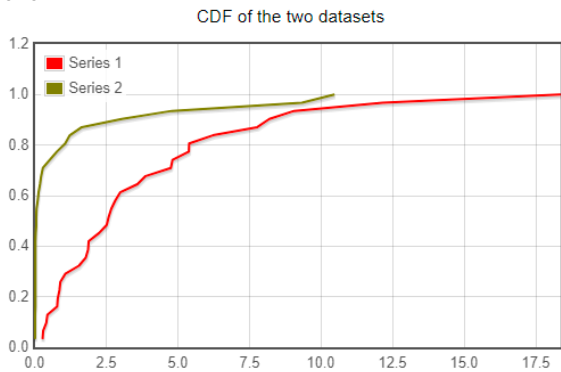

(b)

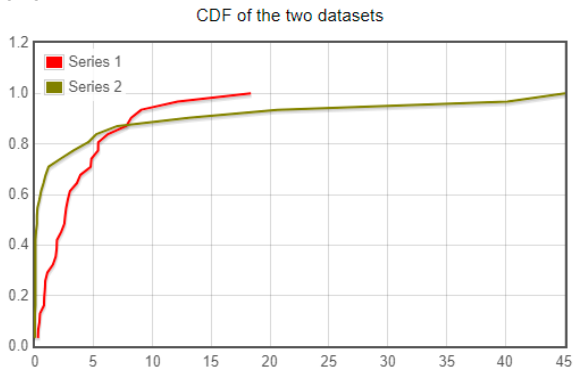

(c)

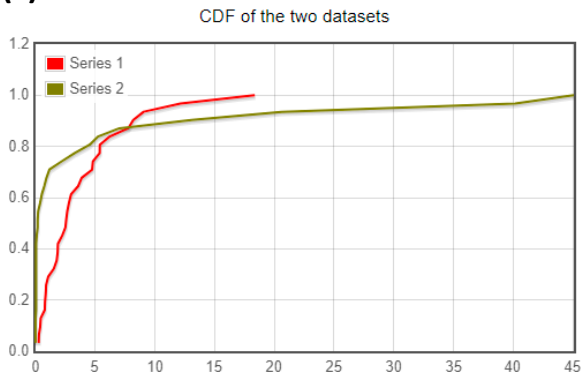

(d)

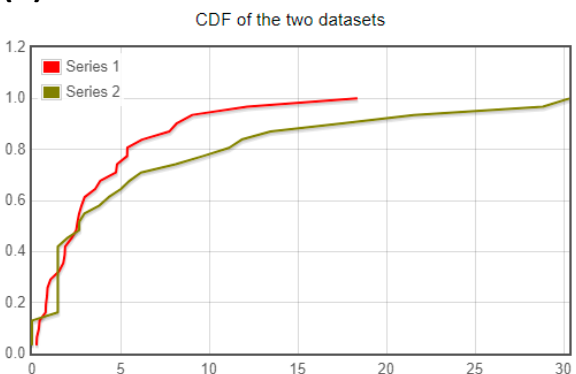

(e)

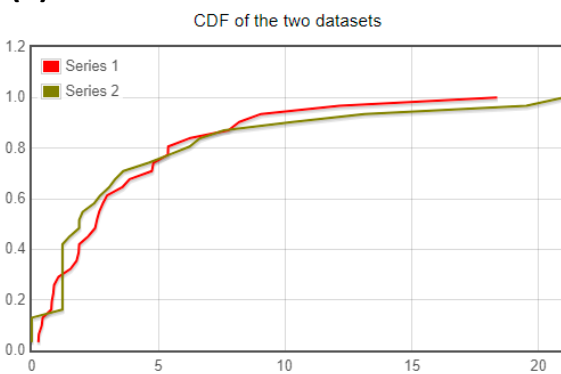

| No Correction | Linear Scaling | Local Intensity Scaling | Power Transformation | Distribution Mapping |
|---------------|----------------|-------------------------|----------------------|----------------------|
| <b>D</b>      | <b>D</b>       | <b>D</b>                | <b>D</b>             | <b>D</b>             |
| 0.67          | 0.54           | 0.54                    | 0.19                 | 0.16                 |

## Maximum Temperature

(a)

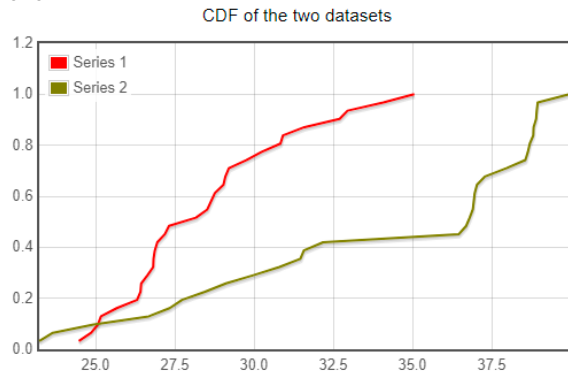

(b)

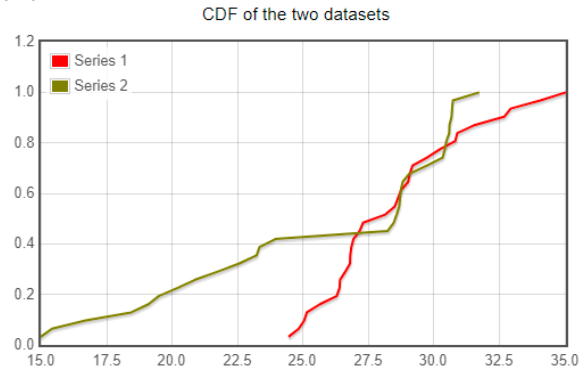

(c)

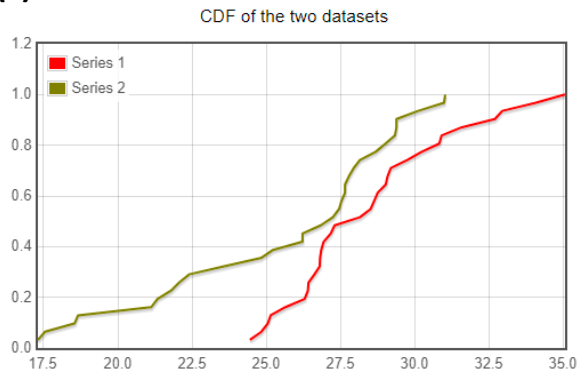

(d)

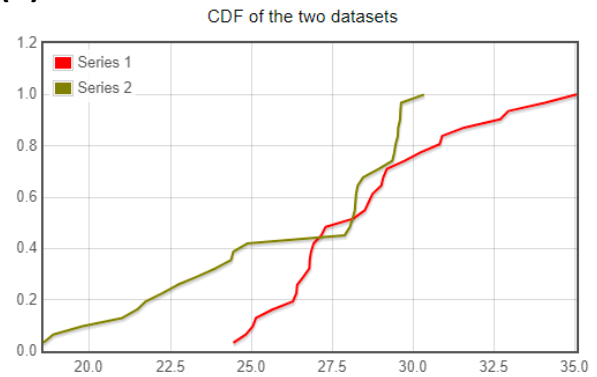

| No Correction | Linear Scaling | Variance scaling | Distribution Mapping |
|---------------|----------------|------------------|----------------------|
| D             | D              | D                | D                    |
| 0.58          | 0.41           | 0.32             | 0.35                 |

## Minimum Temperature

(a)

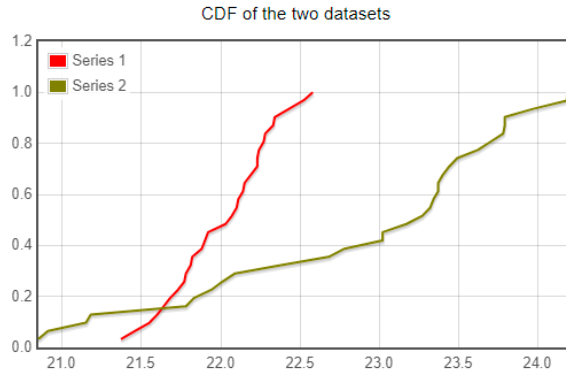

(b)

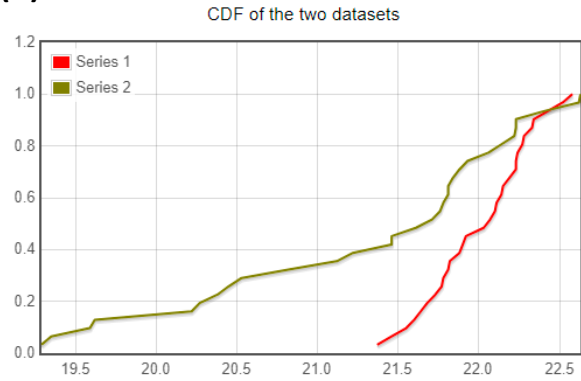

(c)

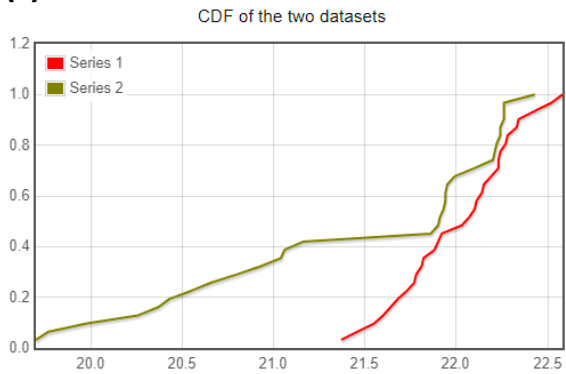

(d)

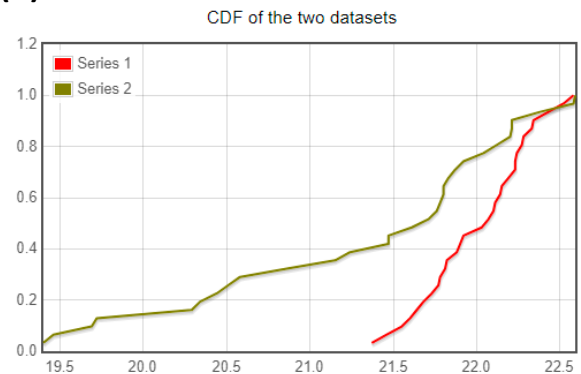

| No Correction | Linear Scaling | Variance scaling | Distribution Mapping |
|---------------|----------------|------------------|----------------------|
| <b>D</b>      | <b>D</b>       | <b>D</b>         | <b>D</b>             |
| 0.67          | 0.38           | 0.41             | 0.38                 |

# 11. NorESM1\_M

## Precipitation

(a)

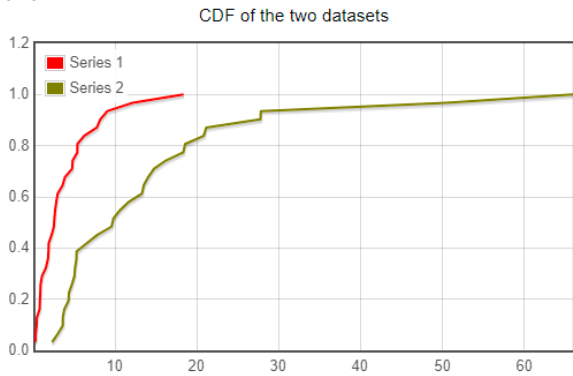

(b)

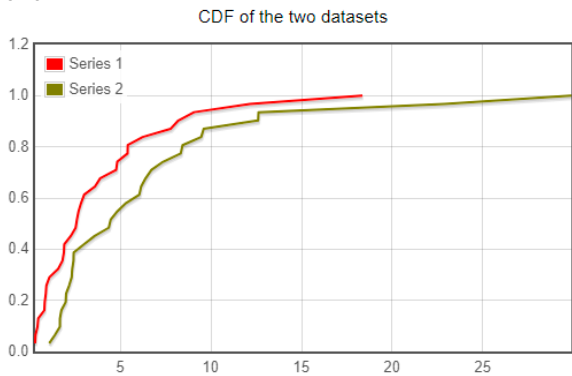

(c)

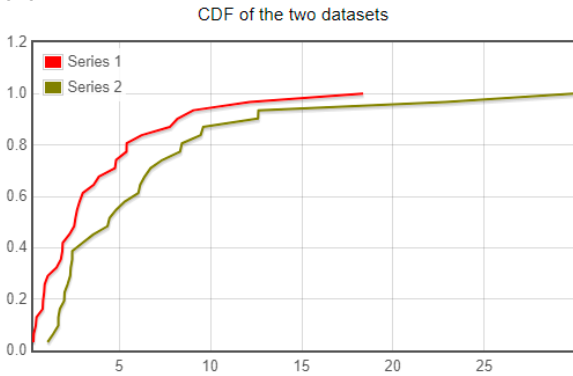

(d)

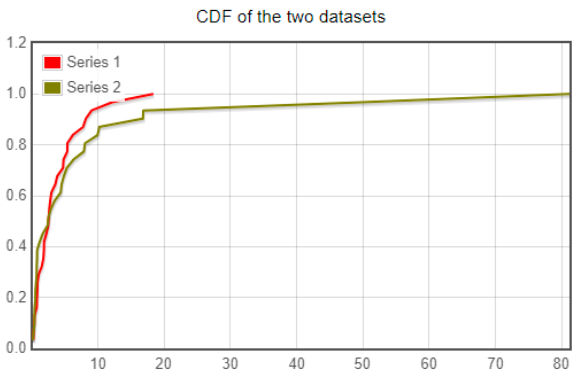

(e)

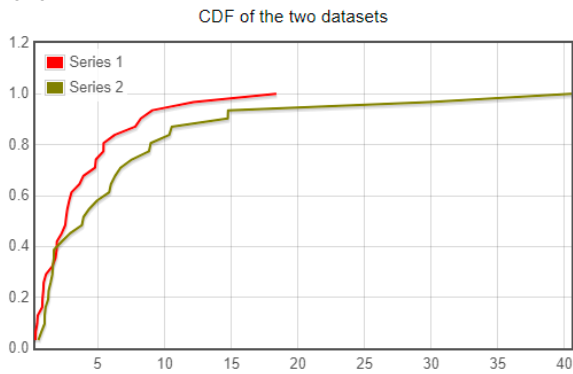

| No Correction | Linear Scaling | Local Intensity Scaling | Power Transformation | Distribution Mapping |
|---------------|----------------|-------------------------|----------------------|----------------------|
| D             | D              | D                       | D                    | D                    |
| 0.58          | 0.25           | 0.25                    | 0.19                 | 0.22                 |

## Maximum Temperature

(a)

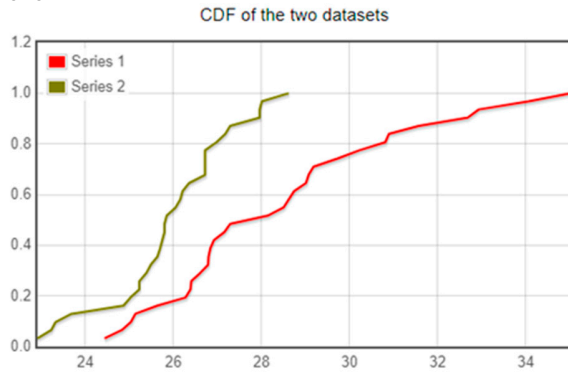

(b)

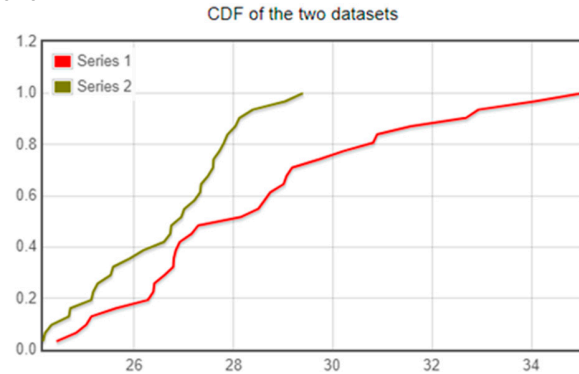

(c)

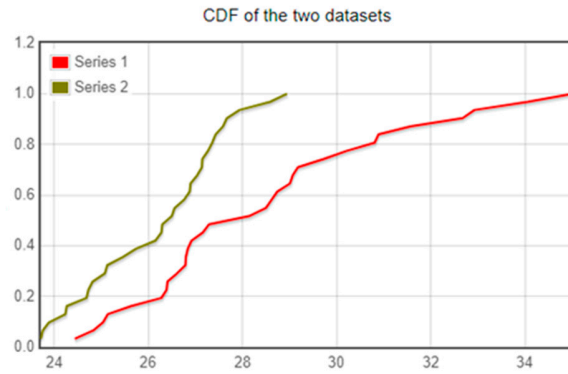

(d)

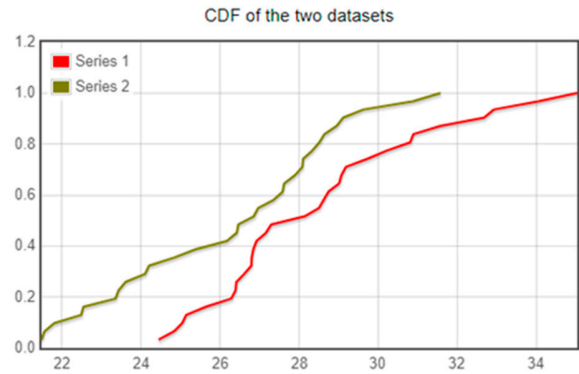

| No Correction | Linear Scaling | Variance scaling | Distribution Mapping |
|---------------|----------------|------------------|----------------------|
| <b>D</b>      | <b>D</b>       | <b>D</b>         | <b>D</b>             |
| 0.48          | 0.41           | 0.45             | 0.32                 |



## Minimum Temperature

(a)

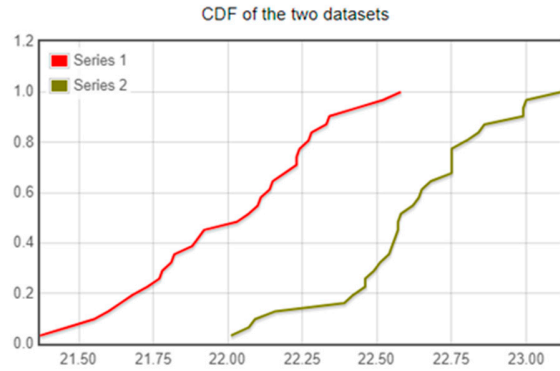

(b)

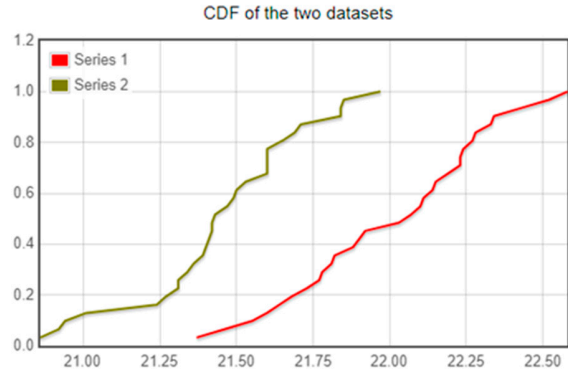

(c)

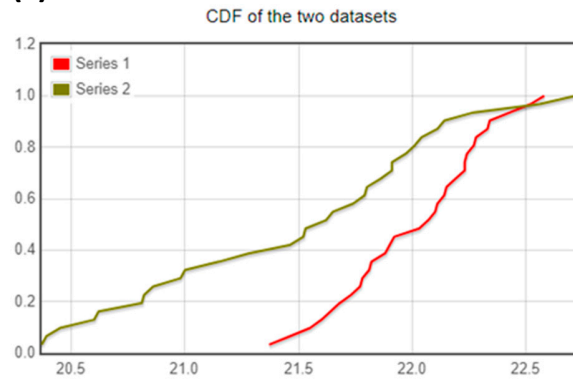

(d)

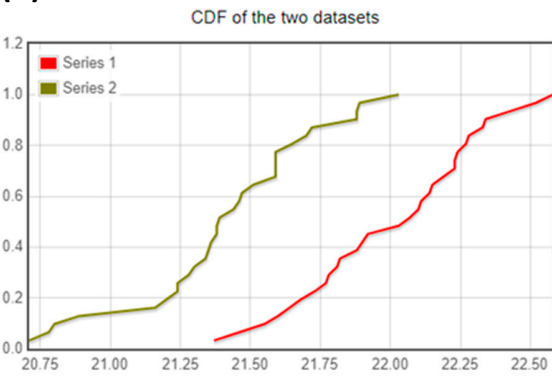

| No Correction | Linear Scaling | Variance scaling | Distribution Mapping |
|---------------|----------------|------------------|----------------------|
| D             | D              | D                | D                    |
| 0.77          | 0.67           | 0.41             | 0.67                 |
